# Supplementary material
Source: publisher figshare collection journal article supplement (https://rs.figshare.com/ndownloader/files/19615514)
Supplement: Supplementary file 1 [file 19615514]

## Sheet: Blad1
Strata	Chromosome	Start position	Zebra finch Gene ID	Zebra finch Transcript ID	Gene Name	GO ID	GO Aspect	GO Term Name
stratum 1	Z	7532411	ENSTGUG00000000468	ENSTGUT00000000482	SPIN1	GO:0005819	cellular_component	spindle
stratum 1	Z	7532411	ENSTGUG00000000468	ENSTGUT00000000482	SPIN1	GO:0005730	cellular_component	nucleolus
stratum 1	Z	7532411	ENSTGUG00000000468	ENSTGUT00000000482	SPIN1	GO:0031965	cellular_component	nuclear membrane
stratum 1	Z	7532411	ENSTGUG00000000468	ENSTGUT00000000482	SPIN1	GO:0035064	molecular_function	methylated histone binding
stratum 1	Z	7532411	ENSTGUG00000000468	ENSTGUT00000000482	SPIN1	GO:0030177	biological_process	positive regulation of Wnt signaling pathway
stratum 1	Z	7532411	ENSTGUG00000000468	ENSTGUT00000000482	SPIN1	GO:0005829	cellular_component	cytosol
stratum 1	Z	7532411	ENSTGUG00000000468	ENSTGUT00000000482	SPIN1	GO:0005654	cellular_component	nucleoplasm
stratum 1	Z	7532411	ENSTGUG00000000468	ENSTGUT00000000482	SPIN1	GO:0007276	biological_process	gamete generation
stratum 1	Z	7532411	ENSTGUG00000000468	ENSTGUT00000000482	SPIN1	GO:0009303	biological_process	rRNA transcription
stratum 1	Z	7532411	ENSTGUG00000000468	ENSTGUT00000000482	SPIN1	GO:0005634	cellular_component	nucleus
stratum 1	Z	7532411	ENSTGUG00000000468	ENSTGUT00000000482	SPIN1	GO:0045893	biological_process	positive regulation of transcription, DNA-templated
stratum 1	Z	9827333	ENSTGUG00000000552	ENSTGUT00000000582	FANCC	GO:0097150	biological_process	neuronal stem cell population maintenance
stratum 1	Z	9827333	ENSTGUG00000000552	ENSTGUT00000000582	FANCC	GO:0006974	biological_process	cellular response to DNA damage stimulus
stratum 1	Z	9827333	ENSTGUG00000000552	ENSTGUT00000000582	FANCC	GO:0006281	biological_process	DNA repair
stratum 1	Z	9827333	ENSTGUG00000000552	ENSTGUT00000000582	FANCC	GO:0007276	biological_process	gamete generation
stratum 1	Z	9827333	ENSTGUG00000000552	ENSTGUT00000000582	FANCC	GO:0007281	biological_process	germ cell development
stratum 1	Z	9827333	ENSTGUG00000000552	ENSTGUT00000000582	FANCC	GO:0006289	biological_process	nucleotide-excision repair
stratum 1	Z	9827333	ENSTGUG00000000552	ENSTGUT00000000582	FANCC	GO:0034599	biological_process	cellular response to oxidative stress
stratum 1	Z	9827333	ENSTGUG00000000552	ENSTGUT00000000582	FANCC	GO:0005829	cellular_component	cytosol
stratum 1	Z	9827333	ENSTGUG00000000552	ENSTGUT00000000582	FANCC	GO:0005737	cellular_component	cytoplasm
stratum 1	Z	9827333	ENSTGUG00000000552	ENSTGUT00000000582	FANCC	GO:0048854	biological_process	brain morphogenesis
stratum 1	Z	9827333	ENSTGUG00000000552	ENSTGUT00000000582	FANCC	GO:0019430	biological_process	removal of superoxide radicals
stratum 1	Z	9827333	ENSTGUG00000000552	ENSTGUT00000000582	FANCC	GO:0043240	cellular_component	Fanconi anaemia nuclear complex
stratum 1	Z	9827333	ENSTGUG00000000552	ENSTGUT00000000582	FANCC	GO:0005634	cellular_component	nucleus
stratum 1	Z	9827333	ENSTGUG00000000552	ENSTGUT00000000582	FANCC	GO:0002262	biological_process	myeloid cell homeostasis
stratum 1	Z	31431047	ENSTGUG00000001446	ENSTGUT00000001514	DNAJA1	GO:0043066	biological_process	negative regulation of apoptotic process
stratum 1	Z	31431047	ENSTGUG00000001446	ENSTGUT00000001514	DNAJA1	GO:0043065	biological_process	positive regulation of apoptotic process
stratum 1	Z	31431047	ENSTGUG00000001446	ENSTGUT00000001514	DNAJA1	GO:0000151	cellular_component	ubiquitin ligase complex
stratum 1	Z	31431047	ENSTGUG00000001446	ENSTGUT00000001514	DNAJA1	GO:1905259	biological_process	negative regulation of nitrosative stress-induced intrinsic apoptotic signaling pathway
stratum 1	Z	31431047	ENSTGUG00000001446	ENSTGUT00000001514	DNAJA1	GO:0043508	biological_process	negative regulation of JUN kinase activity
stratum 1	Z	31431047	ENSTGUG00000001446	ENSTGUT00000001514	DNAJA1	GO:0005524	molecular_function	ATP binding
stratum 1	Z	31431047	ENSTGUG00000001446	ENSTGUT00000001514	DNAJA1	GO:0005829	cellular_component	cytosol
stratum 1	Z	31431047	ENSTGUG00000001446	ENSTGUT00000001514	DNAJA1	GO:0016020	cellular_component	membrane
stratum 1	Z	31431047	ENSTGUG00000001446	ENSTGUT00000001514	DNAJA1	GO:0051082	molecular_function	unfolded protein binding
stratum 1	Z	31431047	ENSTGUG00000001446	ENSTGUT00000001514	DNAJA1	GO:0031397	biological_process	negative regulation of protein ubiquitination
stratum 1	Z	31431047	ENSTGUG00000001446	ENSTGUT00000001514	DNAJA1	GO:0015630	cellular_component	microtubule cytoskeleton
stratum 1	Z	31431047	ENSTGUG00000001446	ENSTGUT00000001514	DNAJA1	GO:0051223	biological_process	regulation of protein transport
stratum 1	Z	31431047	ENSTGUG00000001446	ENSTGUT00000001514	DNAJA1	GO:1901998	biological_process	toxin transport
stratum 1	Z	31431047	ENSTGUG00000001446	ENSTGUT00000001514	DNAJA1	GO:1903748	biological_process	negative regulation of establishment of protein localization to mitochondrion
stratum 1	Z	31431047	ENSTGUG00000001446	ENSTGUT00000001514	DNAJA1	GO:0006457	biological_process	protein folding
stratum 1	Z	31431047	ENSTGUG00000001446	ENSTGUT00000001514	DNAJA1	GO:0046872	molecular_function	metal ion binding
stratum 1	Z	31431047	ENSTGUG00000001446	ENSTGUT00000001514	DNAJA1	GO:0001671	molecular_function	ATPase activator activity
stratum 1	Z	31431047	ENSTGUG00000001446	ENSTGUT00000001514	DNAJA1	GO:0031625	molecular_function	ubiquitin protein ligase binding
stratum 1	Z	31431047	ENSTGUG00000001446	ENSTGUT00000001514	DNAJA1	GO:0050750	molecular_function	low-density lipoprotein particle receptor binding
stratum 1	Z	31431047	ENSTGUG00000001446	ENSTGUT00000001514	DNAJA1	GO:0030521	biological_process	androgen receptor signaling pathway
stratum 1	Z	31431047	ENSTGUG00000001446	ENSTGUT00000001514	DNAJA1	GO:0030317	biological_process	flagellated sperm motility
stratum 1	Z	31431047	ENSTGUG00000001446	ENSTGUT00000001514	DNAJA1	GO:0055131	molecular_function	C3HC4-type RING finger domain binding
stratum 1	Z	31431047	ENSTGUG00000001446	ENSTGUT00000001514	DNAJA1	GO:0032781	biological_process	positive regulation of ATPase activity
stratum 1	Z	31431047	ENSTGUG00000001446	ENSTGUT00000001514	DNAJA1	GO:0031072	molecular_function	heat shock protein binding
stratum 1	Z	31431047	ENSTGUG00000001446	ENSTGUT00000001514	DNAJA1	GO:0030544	molecular_function	Hsp70 protein binding
stratum 1	Z	31431047	ENSTGUG00000001446	ENSTGUT00000001514	DNAJA1	GO:0009408	biological_process	response to heat
stratum 1	Z	31431047	ENSTGUG00000001446	ENSTGUT00000001514	DNAJA1	GO:0030957	molecular_function	Tat protein binding
stratum 1	Z	31431047	ENSTGUG00000001446	ENSTGUT00000001514	DNAJA1	GO:0070585	biological_process	protein localization to mitochondrion
stratum 1	Z	31431047	ENSTGUG00000001446	ENSTGUT00000001514	DNAJA1	GO:0007283	biological_process	spermatogenesis
stratum 1	Z	31431047	ENSTGUG00000001446	ENSTGUT00000001514	DNAJA1	GO:0051087	molecular_function	chaperone binding
stratum 1	Z	31431047	ENSTGUG00000001446	ENSTGUT00000001514	DNAJA1	GO:0001664	molecular_function	G-protein coupled receptor binding
stratum 1	Z	31483912	ENSTGUG00000001463	ENSTGUT00000001523	B4GALT1	GO:0030198	biological_process	extracellular matrix organization
stratum 1	Z	31483912	ENSTGUG00000001463	ENSTGUT00000001523	B4GALT1	GO:0060046	biological_process	regulation of acrosome reaction
stratum 1	Z	31483912	ENSTGUG00000001463	ENSTGUT00000001523	B4GALT1	GO:0042060	biological_process	wound healing
stratum 1	Z	31483912	ENSTGUG00000001463	ENSTGUT00000001523	B4GALT1	GO:0042127	biological_process	regulation of cell proliferation
stratum 1	Z	31483912	ENSTGUG00000001463	ENSTGUT00000001523	B4GALT1	GO:0048754	biological_process	branching morphogenesis of an epithelial tube
stratum 1	Z	31483912	ENSTGUG00000001463	ENSTGUT00000001523	B4GALT1	GO:0043065	biological_process	positive regulation of apoptotic process
stratum 1	Z	31483912	ENSTGUG00000001463	ENSTGUT00000001523	B4GALT1	GO:0045136	biological_process	development of secondary sexual characteristics
stratum 1	Z	31483912	ENSTGUG00000001463	ENSTGUT00000001523	B4GALT1	GO:0005989	biological_process	lactose biosynthetic process
stratum 1	Z	31483912	ENSTGUG00000001463	ENSTGUT00000001523	B4GALT1	GO:0035250	molecular_function	UDP-galactosyltransferase activity
stratum 1	Z	31483912	ENSTGUG00000001463	ENSTGUT00000001523	B4GALT1	GO:0002064	biological_process	epithelial cell development
stratum 1	Z	31483912	ENSTGUG00000001463	ENSTGUT00000001523	B4GALT1	GO:0009312	biological_process	oligosaccharide biosynthetic process
stratum 1	Z	31483912	ENSTGUG00000001463	ENSTGUT00000001523	B4GALT1	GO:0008285	biological_process	negative regulation of cell proliferation
stratum 1	Z	31483912	ENSTGUG00000001463	ENSTGUT00000001523	B4GALT1	GO:0002526	biological_process	acute inflammatory response
stratum 1	Z	31483912	ENSTGUG00000001463	ENSTGUT00000001523	B4GALT1	GO:0060055	biological_process	angiogenesis involved in wound healing
stratum 1	Z	31483912	ENSTGUG00000001463	ENSTGUT00000001523	B4GALT1	GO:0009101	biological_process	glycoprotein biosynthetic process
stratum 1	Z	31483912	ENSTGUG00000001463	ENSTGUT00000001523	B4GALT1	GO:0007341	biological_process	penetration of zona pellucida
stratum 1	Z	31483912	ENSTGUG00000001463	ENSTGUT00000001523	B4GALT1	GO:0006486	biological_process	protein glycosylation
stratum 1	Z	31483912	ENSTGUG00000001463	ENSTGUT00000001523	B4GALT1	GO:0003945	molecular_function	N-acetyllactosamine synthase activity
stratum 1	Z	31483912	ENSTGUG00000001463	ENSTGUT00000001523	B4GALT1	GO:0060054	biological_process	positive regulation of epithelial cell proliferation involved in wound healing
stratum 1	Z	31483912	ENSTGUG00000001463	ENSTGUT00000001523	B4GALT1	GO:0007339	biological_process	binding of sperm to zona pellucida
stratum 1	Z	31483912	ENSTGUG00000001463	ENSTGUT00000001523	B4GALT1	GO:0050900	biological_process	leukocyte migration
stratum 1	Z	31483912	ENSTGUG00000001463	ENSTGUT00000001523	B4GALT1	GO:0006012	biological_process	galactose metabolic process
stratum 1	Z	31483912	ENSTGUG00000001463	ENSTGUT00000001523	B4GALT1	GO:0030057	cellular_component	desmosome
stratum 1	Z	31483912	ENSTGUG00000001463	ENSTGUT00000001523	B4GALT1	GO:0060058	biological_process	positive regulation of apoptotic process involved in mammary gland involution
stratum 1	Z	31483912	ENSTGUG00000001463	ENSTGUT00000001523	B4GALT1	GO:0030145	molecular_function	manganese ion binding
stratum 1	Z	31483912	ENSTGUG00000001463	ENSTGUT00000001523	B4GALT1	GO:0003831	molecular_function	beta-N-acetylglucosaminylglycopeptide beta-1,4-galactosyltransferase activity
stratum 1	Z	31483912	ENSTGUG00000001463	ENSTGUT00000001523	B4GALT1	GO:0007155	biological_process	cell adhesion
stratum 1	Z	31483912	ENSTGUG00000001463	ENSTGUT00000001523	B4GALT1	GO:0051260	biological_process	protein homooligomerization
stratum 1	Z	31483912	ENSTGUG00000001463	ENSTGUT00000001523	B4GALT1	GO:0006487	biological_process	protein N-linked glycosylation
stratum 1	Z	31483912	ENSTGUG00000001463	ENSTGUT00000001523	B4GALT1	GO:0008378	molecular_function	galactosyltransferase activity
stratum 1	Z	31483912	ENSTGUG00000001463	ENSTGUT00000001523	B4GALT1	GO:0016757	molecular_function	transferase activity, transferring glycosyl groups
stratum 1	Z	31483912	ENSTGUG00000001463	ENSTGUT00000001523	B4GALT1	GO:0009986	cellular_component	cell surface
stratum 1	Z	31483912	ENSTGUG00000001463	ENSTGUT00000001523	B4GALT1	GO:0051270	biological_process	regulation of cellular component movement
stratum 1	Z	31483912	ENSTGUG00000001463	ENSTGUT00000001523	B4GALT1	GO:0005975	biological_process	carbohydrate metabolic process
stratum 1	Z	31483912	ENSTGUG00000001463	ENSTGUT00000001523	B4GALT1	GO:0008092	molecular_function	cytoskeletal protein binding
stratum 1	Z	31483912	ENSTGUG00000001463	ENSTGUT00000001523	B4GALT1	GO:0031526	cellular_component	brush border membrane
stratum 1	Z	31483912	ENSTGUG00000001463	ENSTGUT00000001523	B4GALT1	GO:0004461	molecular_function	lactose synthase activity
stratum 1	Z	31483912	ENSTGUG00000001463	ENSTGUT00000001523	B4GALT1	GO:0009897	cellular_component	external side of plasma membrane
stratum 1	Z	31483912	ENSTGUG00000001463	ENSTGUT00000001523	B4GALT1	GO:0016323	cellular_component	basolateral plasma membrane
stratum 1	Z	31483912	ENSTGUG00000001463	ENSTGUT00000001523	B4GALT1	GO:0005886	cellular_component	plasma membrane
stratum 1	Z	31483912	ENSTGUG00000001463	ENSTGUT00000001523	B4GALT1	GO:0005794	cellular_component	Golgi apparatus
stratum 1	Z	31483912	ENSTGUG00000001463	ENSTGUT00000001523	B4GALT1	GO:0000138	cellular_component	Golgi trans cisterna
stratum 1	Z	39169581	ENSTGUG00000001772	ENSTGUT00000001844	FANCG	GO:0005886	cellular_component	plasma membrane
stratum 1	Z	39169581	ENSTGUG00000001772	ENSTGUT00000001844	FANCG	GO:0009314	biological_process	response to radiation
stratum 1	Z	39169581	ENSTGUG00000001772	ENSTGUT00000001844	FANCG	GO:0007286	biological_process	spermatid development
stratum 1	Z	39169581	ENSTGUG00000001772	ENSTGUT00000001844	FANCG	GO:0043240	cellular_component	Fanconi anaemia nuclear complex
stratum 1	Z	39169581	ENSTGUG00000001772	ENSTGUT00000001844	FANCG	GO:0005829	cellular_component	cytosol
stratum 1	Z	39169581	ENSTGUG00000001772	ENSTGUT00000001844	FANCG	GO:0007005	biological_process	mitochondrion organization
stratum 1	Z	39169581	ENSTGUG00000001772	ENSTGUT00000001844	FANCG	GO:0006974	biological_process	cellular response to DNA damage stimulus
stratum 1	Z	39169581	ENSTGUG00000001772	ENSTGUT00000001844	FANCG	GO:0005739	cellular_component	mitochondrion
stratum 1	Z	39169581	ENSTGUG00000001772	ENSTGUT00000001844	FANCG	GO:0001541	biological_process	ovarian follicle development
stratum 1	Z	39169581	ENSTGUG00000001772	ENSTGUT00000001844	FANCG	GO:0005730	cellular_component	nucleolus
stratum 1	Z	41673357	ENSTGUG00000002027	ENSTGUT00000002106	SKP2	GO:0051726	biological_process	regulation of cell cycle
stratum 1	Z	41673357	ENSTGUG00000002027	ENSTGUT00000002106	SKP2	GO:0006511	biological_process	ubiquitin-dependent protein catabolic process
stratum 1	Z	41673357	ENSTGUG00000002027	ENSTGUT00000002106	SKP2	GO:0033148	biological_process	positive regulation of intracellular estrogen receptor signaling pathway
stratum 1	Z	41673357	ENSTGUG00000002027	ENSTGUT00000002106	SKP2	GO:0042802	molecular_function	identical protein binding
stratum 1	Z	41673357	ENSTGUG00000002027	ENSTGUT00000002106	SKP2	GO:0042981	biological_process	regulation of apoptotic process
stratum 1	Z	41673357	ENSTGUG00000002027	ENSTGUT00000002106	SKP2	GO:0000082	biological_process	G1/S transition of mitotic cell cycle
stratum 1	Z	41673357	ENSTGUG00000002027	ENSTGUT00000002106	SKP2	GO:0019005	cellular_component	SCF ubiquitin ligase complex
stratum 1	Z	41673357	ENSTGUG00000002027	ENSTGUT00000002106	SKP2	GO:0061630	molecular_function	ubiquitin protein ligase activity
stratum 1	Z	41673357	ENSTGUG00000002027	ENSTGUT00000002106	SKP2	GO:0005634	cellular_component	nucleus
stratum 1	Z	41673357	ENSTGUG00000002027	ENSTGUT00000002106	SKP2	GO:1902916	biological_process	positive regulation of protein polyubiquitination
stratum 1	Z	41673357	ENSTGUG00000002027	ENSTGUT00000002106	SKP2	GO:0000209	biological_process	protein polyubiquitination
stratum 1	Z	41673357	ENSTGUG00000002027	ENSTGUT00000002106	SKP2	GO:0005829	cellular_component	cytosol
stratum 1	Z	41673357	ENSTGUG00000002027	ENSTGUT00000002106	SKP2	GO:0000086	biological_process	G2/M transition of mitotic cell cycle
stratum 1	Z	41673357	ENSTGUG00000002027	ENSTGUT00000002106	SKP2	GO:0005730	cellular_component	nucleolus
stratum 2	4A	1629376	ENSTGUG00000002329	ENSTGUT00000002483	DIAPH2	GO:0005730	cellular_component	nucleolus
stratum 2	4A	1629376	ENSTGUG00000002329	ENSTGUT00000002483	DIAPH2	GO:0017048	molecular_function	Rho GTPase binding
stratum 2	4A	1629376	ENSTGUG00000002329	ENSTGUT00000002483	DIAPH2	GO:0030036	biological_process	actin cytoskeleton organization
stratum 2	4A	1629376	ENSTGUG00000002329	ENSTGUT00000002483	DIAPH2	GO:0007292	biological_process	female gamete generation
stratum 2	4A	1629376	ENSTGUG00000002329	ENSTGUT00000002483	DIAPH2	GO:0007015	biological_process	actin filament organization
stratum 2	4A	1629376	ENSTGUG00000002329	ENSTGUT00000002483	DIAPH2	GO:0005783	cellular_component	endoplasmic reticulum
stratum 2	4A	1629376	ENSTGUG00000002329	ENSTGUT00000002483	DIAPH2	GO:0016043	biological_process	cellular component organization
stratum 2	4A	1629376	ENSTGUG00000002329	ENSTGUT00000002483	DIAPH2	GO:0003779	molecular_function	actin binding
stratum 2	4A	1629376	ENSTGUG00000002329	ENSTGUT00000002483	DIAPH2	GO:0043231	cellular_component	intracellular membrane-bounded organelle
stratum 2	4A	3984549	ENSTGUG00000002423	ENSTGUT00000002525	DACH2	GO:0046545	biological_process	development of primary female sexual characteristics
stratum 1	Z	47475452	ENSTGUG00000002548	ENSTGUT00000002659	DDX4	GO:0004386	molecular_function	helicase activity
stratum 1	Z	47475452	ENSTGUG00000002548	ENSTGUT00000002659	DDX4	GO:0003676	molecular_function	nucleic acid binding
stratum 1	Z	47475452	ENSTGUG00000002548	ENSTGUT00000002659	DDX4	GO:0005524	molecular_function	ATP binding
stratum 1	Z	47475452	ENSTGUG00000002548	ENSTGUT00000002659	DDX4	GO:0016787	molecular_function	hydrolase activity
stratum 1	Z	47475452	ENSTGUG00000002548	ENSTGUT00000002659	DDX4	GO:0000166	molecular_function	nucleotide binding
stratum 1	Z	47475452	ENSTGUG00000002548	ENSTGUT00000002659	DDX4	GO:0005737	cellular_component	cytoplasm
stratum 1	Z	47475452	ENSTGUG00000002548	ENSTGUT00000002659	DDX4	GO:0030317	biological_process	flagellated sperm motility
stratum 1	Z	49803799	ENSTGUG00000002730	ENSTGUT00000002854	KIF2A	GO:0003777	molecular_function	microtubule motor activity
stratum 1	Z	49803799	ENSTGUG00000002730	ENSTGUT00000002854	KIF2A	GO:0008017	molecular_function	microtubule binding
stratum 1	Z	49803799	ENSTGUG00000002730	ENSTGUT00000002854	KIF2A	GO:0003774	molecular_function	motor activity
stratum 1	Z	49803799	ENSTGUG00000002730	ENSTGUT00000002854	KIF2A	GO:0005814	cellular_component	centriole
stratum 1	Z	49803799	ENSTGUG00000002730	ENSTGUT00000002854	KIF2A	GO:0007018	biological_process	microtubule-based movement
stratum 1	Z	49803799	ENSTGUG00000002730	ENSTGUT00000002854	KIF2A	GO:0005524	molecular_function	ATP binding
stratum 1	Z	49803799	ENSTGUG00000002730	ENSTGUT00000002854	KIF2A	GO:0005737	cellular_component	cytoplasm
stratum 1	Z	49803799	ENSTGUG00000002730	ENSTGUT00000002854	KIF2A	GO:0120103	cellular_component	centriolar subdistal appendage
stratum 1	Z	49803799	ENSTGUG00000002730	ENSTGUT00000002854	KIF2A	GO:0000226	biological_process	microtubule cytoskeleton organization
stratum 1	Z	49803799	ENSTGUG00000002730	ENSTGUT00000002854	KIF2A	GO:0005634	cellular_component	nucleus
stratum 1	Z	49803799	ENSTGUG00000002730	ENSTGUT00000002854	KIF2A	GO:0000166	molecular_function	nucleotide binding
stratum 1	Z	49803799	ENSTGUG00000002730	ENSTGUT00000002854	KIF2A	GO:0005730	cellular_component	nucleolus
stratum 1	Z	49803799	ENSTGUG00000002730	ENSTGUT00000002854	KIF2A	GO:0005874	cellular_component	microtubule
stratum 1	Z	49803799	ENSTGUG00000002730	ENSTGUT00000002854	KIF2A	GO:0097228	cellular_component	sperm principal piece
stratum 1	Z	49803799	ENSTGUG00000002730	ENSTGUT00000002854	KIF2A	GO:0030334	biological_process	regulation of cell migration
stratum 1	Z	49803799	ENSTGUG00000002730	ENSTGUT00000002854	KIF2A	GO:0000922	cellular_component	spindle pole
stratum 1	Z	49803799	ENSTGUG00000002730	ENSTGUT00000002854	KIF2A	GO:0016604	cellular_component	nuclear body
stratum 1	Z	49803799	ENSTGUG00000002730	ENSTGUT00000002854	KIF2A	GO:0005813	cellular_component	centrosome
stratum 1	Z	49803799	ENSTGUG00000002730	ENSTGUT00000002854	KIF2A	GO:0007052	biological_process	mitotic spindle organization
stratum 1	Z	49803799	ENSTGUG00000002730	ENSTGUT00000002854	KIF2A	GO:0090307	biological_process	mitotic spindle assembly
stratum 1	Z	49803799	ENSTGUG00000002730	ENSTGUT00000002854	KIF2A	GO:0005876	cellular_component	spindle microtubule
stratum 2	4A	6416086	ENSTGUG00000002760	ENSTGUT00000002888	AR	GO:0030521	biological_process	androgen receptor signaling pathway
stratum 2	4A	6416086	ENSTGUG00000002760	ENSTGUT00000002888	AR	GO:0000790	cellular_component	nuclear chromatin
stratum 2	4A	6416086	ENSTGUG00000002760	ENSTGUT00000002888	AR	GO:0010468	biological_process	regulation of gene expression
stratum 2	4A	6416086	ENSTGUG00000002760	ENSTGUT00000002888	AR	GO:0019102	biological_process	male somatic sex determination
stratum 2	4A	6416086	ENSTGUG00000002760	ENSTGUT00000002888	AR	GO:0043410	biological_process	positive regulation of MAPK cascade
stratum 2	4A	6416086	ENSTGUG00000002760	ENSTGUT00000002888	AR	GO:1903076	biological_process	regulation of protein localization to plasma membrane
stratum 2	4A	6416086	ENSTGUG00000002760	ENSTGUT00000002888	AR	GO:0008270	molecular_function	zinc ion binding
stratum 2	4A	6416086	ENSTGUG00000002760	ENSTGUT00000002888	AR	GO:0009566	biological_process	fertilization
stratum 2	4A	6416086	ENSTGUG00000002760	ENSTGUT00000002888	AR	GO:0043568	biological_process	positive regulation of insulin-like growth factor receptor signaling pathway
stratum 2	4A	6416086	ENSTGUG00000002760	ENSTGUT00000002888	AR	GO:0046872	molecular_function	metal ion binding
stratum 2	4A	6416086	ENSTGUG00000002760	ENSTGUT00000002888	AR	GO:0072520	biological_process	seminiferous tubule development
stratum 2	4A	6416086	ENSTGUG00000002760	ENSTGUT00000002888	AR	GO:0010628	biological_process	positive regulation of gene expression
stratum 2	4A	6416086	ENSTGUG00000002760	ENSTGUT00000002888	AR	GO:0005634	cellular_component	nucleus
stratum 2	4A	6416086	ENSTGUG00000002760	ENSTGUT00000002888	AR	GO:2001237	biological_process	negative regulation of extrinsic apoptotic signaling pathway
stratum 2	4A	6416086	ENSTGUG00000002760	ENSTGUT00000002888	AR	GO:0006355	biological_process	regulation of transcription, DNA-templated
stratum 2	4A	6416086	ENSTGUG00000002760	ENSTGUT00000002888	AR	GO:0004879	molecular_function	nuclear receptor activity
stratum 2	4A	6416086	ENSTGUG00000002760	ENSTGUT00000002888	AR	GO:0001085	molecular_function	RNA polymerase II transcription factor binding
stratum 2	4A	6416086	ENSTGUG00000002760	ENSTGUT00000002888	AR	GO:0003682	molecular_function	chromatin binding
stratum 2	4A	6416086	ENSTGUG00000002760	ENSTGUT00000002888	AR	GO:0003700	molecular_function	DNA binding transcription factor activity
stratum 2	4A	6416086	ENSTGUG00000002760	ENSTGUT00000002888	AR	GO:0042327	biological_process	positive regulation of phosphorylation
stratum 2	4A	6416086	ENSTGUG00000002760	ENSTGUT00000002888	AR	GO:0003677	molecular_function	DNA binding
stratum 2	4A	6416086	ENSTGUG00000002760	ENSTGUT00000002888	AR	GO:0030522	biological_process	intracellular receptor signaling pathway
stratum 2	4A	6416086	ENSTGUG00000002760	ENSTGUT00000002888	AR	GO:0007338	biological_process	single fertilization
stratum 2	4A	6416086	ENSTGUG00000002760	ENSTGUT00000002888	AR	GO:0045597	biological_process	positive regulation of cell differentiation
stratum 2	4A	6416086	ENSTGUG00000002760	ENSTGUT00000002888	AR	GO:0033327	biological_process	Leydig cell differentiation
stratum 2	4A	6416086	ENSTGUG00000002760	ENSTGUT00000002888	AR	GO:0016607	cellular_component	nuclear speck
stratum 2	4A	6416086	ENSTGUG00000002760	ENSTGUT00000002888	AR	GO:0006351	biological_process	transcription, DNA-templated
stratum 2	4A	6416086	ENSTGUG00000002760	ENSTGUT00000002888	AR	GO:0008285	biological_process	negative regulation of cell proliferation
stratum 2	4A	6416086	ENSTGUG00000002760	ENSTGUT00000002888	AR	GO:0008584	biological_process	male gonad development
stratum 2	4A	6416086	ENSTGUG00000002760	ENSTGUT00000002888	AR	GO:0003707	molecular_function	steroid hormone receptor activity
stratum 2	4A	6416086	ENSTGUG00000002760	ENSTGUT00000002888	AR	GO:0045893	biological_process	positive regulation of transcription, DNA-templated
stratum 2	4A	6416086	ENSTGUG00000002760	ENSTGUT00000002888	AR	GO:0045944	biological_process	positive regulation of transcription by RNA polymerase II
stratum 2	4A	6416086	ENSTGUG00000002760	ENSTGUT00000002888	AR	GO:0051259	biological_process	protein complex oligomerization
stratum 2	4A	6416086	ENSTGUG00000002760	ENSTGUT00000002888	AR	GO:0060520	biological_process	activation of prostate induction by androgen receptor signaling pathway
stratum 2	4A	6416086	ENSTGUG00000002760	ENSTGUT00000002888	AR	GO:0060571	biological_process	morphogenesis of an epithelial fold
stratum 2	4A	6416086	ENSTGUG00000002760	ENSTGUT00000002888	AR	GO:0005737	cellular_component	cytoplasm
stratum 2	4A	6416086	ENSTGUG00000002760	ENSTGUT00000002888	AR	GO:0033148	biological_process	positive regulation of intracellular estrogen receptor signaling pathway
stratum 2	4A	6416086	ENSTGUG00000002760	ENSTGUT00000002888	AR	GO:0071394	biological_process	cellular response to testosterone stimulus
stratum 2	4A	6416086	ENSTGUG00000002760	ENSTGUT00000002888	AR	GO:0003073	biological_process	regulation of systemic arterial blood pressure
stratum 2	4A	6416086	ENSTGUG00000002760	ENSTGUT00000002888	AR	GO:0070974	molecular_function	POU domain binding
stratum 2	4A	6416086	ENSTGUG00000002760	ENSTGUT00000002888	AR	GO:0009987	biological_process	cellular process
stratum 2	4A	6416086	ENSTGUG00000002760	ENSTGUT00000002888	AR	GO:0035264	biological_process	multicellular organism growth
stratum 2	4A	6416086	ENSTGUG00000002760	ENSTGUT00000002888	AR	GO:0004882	molecular_function	androgen receptor activity
stratum 2	4A	6416086	ENSTGUG00000002760	ENSTGUT00000002888	AR	GO:0045720	biological_process	negative regulation of integrin biosynthetic process
stratum 2	4A	6416086	ENSTGUG00000002760	ENSTGUT00000002888	AR	GO:0045726	biological_process	positive regulation of integrin biosynthetic process
stratum 2	4A	6416086	ENSTGUG00000002760	ENSTGUT00000002888	AR	GO:0048608	biological_process	reproductive structure development
stratum 2	4A	6416086	ENSTGUG00000002760	ENSTGUT00000002888	AR	GO:0005886	cellular_component	plasma membrane
stratum 2	4A	6416086	ENSTGUG00000002760	ENSTGUT00000002888	AR	GO:0005102	molecular_function	signaling receptor binding
stratum 2	4A	6416086	ENSTGUG00000002760	ENSTGUT00000002888	AR	GO:0008284	biological_process	positive regulation of cell proliferation
stratum 2	4A	6416086	ENSTGUG00000002760	ENSTGUT00000002888	AR	GO:0007283	biological_process	spermatogenesis
stratum 2	4A	6416086	ENSTGUG00000002760	ENSTGUT00000002888	AR	GO:0045945	biological_process	positive regulation of transcription by RNA polymerase III
stratum 2	4A	6416086	ENSTGUG00000002760	ENSTGUT00000002888	AR	GO:0000122	biological_process	negative regulation of transcription by RNA polymerase II
stratum 2	4A	6416086	ENSTGUG00000002760	ENSTGUT00000002888	AR	GO:0051117	molecular_function	ATPase binding
stratum 2	4A	6416086	ENSTGUG00000002760	ENSTGUT00000002888	AR	GO:0032991	cellular_component	protein-containing complex
stratum 2	4A	6416086	ENSTGUG00000002760	ENSTGUT00000002888	AR	GO:0006357	biological_process	regulation of transcription by RNA polymerase II
stratum 2	4A	6416086	ENSTGUG00000002760	ENSTGUT00000002888	AR	GO:0071383	biological_process	cellular response to steroid hormone stimulus
stratum 2	4A	6416086	ENSTGUG00000002760	ENSTGUT00000002888	AR	GO:0048638	biological_process	regulation of developmental growth
stratum 2	4A	6416086	ENSTGUG00000002760	ENSTGUT00000002888	AR	GO:0060685	biological_process	regulation of prostatic bud formation
stratum 2	4A	6416086	ENSTGUG00000002760	ENSTGUT00000002888	AR	GO:0001077	molecular_function	transcriptional activator activity, RNA polymerase II proximal promoter sequence-specific DNA binding
stratum 2	4A	6416086	ENSTGUG00000002760	ENSTGUT00000002888	AR	GO:0043565	molecular_function	sequence-specific DNA binding
stratum 2	4A	6416086	ENSTGUG00000002760	ENSTGUT00000002888	AR	GO:0061458	biological_process	reproductive system development
stratum 2	4A	6416086	ENSTGUG00000002760	ENSTGUT00000002888	AR	GO:0044212	molecular_function	transcription regulatory region DNA binding
stratum 2	4A	6416086	ENSTGUG00000002760	ENSTGUT00000002888	AR	GO:0005497	molecular_function	androgen binding
stratum 2	4A	6416086	ENSTGUG00000002760	ENSTGUT00000002888	AR	GO:0060742	biological_process	epithelial cell differentiation involved in prostate gland development
stratum 2	4A	6416086	ENSTGUG00000002760	ENSTGUT00000002888	AR	GO:0003382	biological_process	epithelial cell morphogenesis
stratum 2	4A	6416086	ENSTGUG00000002760	ENSTGUT00000002888	AR	GO:0000978	molecular_function	RNA polymerase II proximal promoter sequence-specific DNA binding
stratum 2	4A	6416086	ENSTGUG00000002760	ENSTGUT00000002888	AR	GO:0060736	biological_process	prostate gland growth
stratum 2	4A	6416086	ENSTGUG00000002760	ENSTGUT00000002888	AR	GO:0019899	molecular_function	enzyme binding
stratum 2	4A	6416086	ENSTGUG00000002760	ENSTGUT00000002888	AR	GO:0008013	molecular_function	beta-catenin binding
stratum 2	4A	6416086	ENSTGUG00000002760	ENSTGUT00000002888	AR	GO:0006366	biological_process	transcription by RNA polymerase II
stratum 2	4A	6416086	ENSTGUG00000002760	ENSTGUT00000002888	AR	GO:0060769	biological_process	positive regulation of epithelial cell proliferation involved in prostate gland development
stratum 2	4A	6416086	ENSTGUG00000002760	ENSTGUT00000002888	AR	GO:0051092	biological_process	positive regulation of NF-kappaB transcription factor activity
stratum 2	4A	6416086	ENSTGUG00000002760	ENSTGUT00000002888	AR	GO:0048808	biological_process	male genitalia morphogenesis
stratum 2	4A	6416086	ENSTGUG00000002760	ENSTGUT00000002888	AR	GO:0050790	biological_process	regulation of catalytic activity
stratum 2	4A	6416086	ENSTGUG00000002760	ENSTGUT00000002888	AR	GO:0008134	molecular_function	transcription factor binding
stratum 2	4A	6416086	ENSTGUG00000002760	ENSTGUT00000002888	AR	GO:0050680	biological_process	negative regulation of epithelial cell proliferation
stratum 2	4A	6416086	ENSTGUG00000002760	ENSTGUT00000002888	AR	GO:0048645	biological_process	animal organ formation
stratum 2	4A	6416086	ENSTGUG00000002760	ENSTGUT00000002888	AR	GO:0060740	biological_process	prostate gland epithelium morphogenesis
stratum 2	4A	6729977	ENSTGUG00000002826	ENSTGUT00000002949	MSN	GO:0005856	cellular_component	cytoskeleton
stratum 2	4A	6729977	ENSTGUG00000002826	ENSTGUT00000002949	MSN	GO:0001771	biological_process	immunological synapse formation
stratum 2	4A	6729977	ENSTGUG00000002826	ENSTGUT00000002949	MSN	GO:0019901	molecular_function	protein kinase binding
stratum 2	4A	6729977	ENSTGUG00000002826	ENSTGUT00000002949	MSN	GO:0007159	biological_process	leukocyte cell-cell adhesion
stratum 2	4A	6729977	ENSTGUG00000002826	ENSTGUT00000002949	MSN	GO:0003725	molecular_function	double-stranded RNA binding
stratum 2	4A	6729977	ENSTGUG00000002826	ENSTGUT00000002949	MSN	GO:0009986	cellular_component	cell surface
stratum 2	4A	6729977	ENSTGUG00000002826	ENSTGUT00000002949	MSN	GO:0005902	cellular_component	microvillus
stratum 2	4A	6729977	ENSTGUG00000002826	ENSTGUT00000002949	MSN	GO:0022614	biological_process	membrane to membrane docking
stratum 2	4A	6729977	ENSTGUG00000002826	ENSTGUT00000002949	MSN	GO:0071944	cellular_component	cell periphery
stratum 2	4A	6729977	ENSTGUG00000002826	ENSTGUT00000002949	MSN	GO:0019899	molecular_function	enzyme binding
stratum 2	4A	6729977	ENSTGUG00000002826	ENSTGUT00000002949	MSN	GO:0005102	molecular_function	signaling receptor binding
stratum 2	4A	6729977	ENSTGUG00000002826	ENSTGUT00000002949	MSN	GO:0008360	biological_process	regulation of cell shape
stratum 2	4A	6729977	ENSTGUG00000002826	ENSTGUT00000002949	MSN	GO:0005829	cellular_component	cytosol
stratum 2	4A	6729977	ENSTGUG00000002826	ENSTGUT00000002949	MSN	GO:0071803	biological_process	positive regulation of podosome assembly
stratum 2	4A	6729977	ENSTGUG00000002826	ENSTGUT00000002949	MSN	GO:0008092	molecular_function	cytoskeletal protein binding
stratum 2	4A	6729977	ENSTGUG00000002826	ENSTGUT00000002949	MSN	GO:0045198	biological_process	establishment of epithelial cell apical/basal polarity
stratum 2	4A	6729977	ENSTGUG00000002826	ENSTGUT00000002949	MSN	GO:0050900	biological_process	leukocyte migration
stratum 2	4A	6729977	ENSTGUG00000002826	ENSTGUT00000002949	MSN	GO:0042098	biological_process	T cell proliferation
stratum 2	4A	6729977	ENSTGUG00000002826	ENSTGUT00000002949	MSN	GO:0070489	biological_process	T cell aggregation
stratum 2	4A	6729977	ENSTGUG00000002826	ENSTGUT00000002949	MSN	GO:0022612	biological_process	gland morphogenesis
stratum 2	4A	6729977	ENSTGUG00000002826	ENSTGUT00000002949	MSN	GO:0072678	biological_process	T cell migration
stratum 2	4A	6729977	ENSTGUG00000002826	ENSTGUT00000002949	MSN	GO:0010628	biological_process	positive regulation of gene expression
stratum 2	4A	6729977	ENSTGUG00000002826	ENSTGUT00000002949	MSN	GO:0016323	cellular_component	basolateral plasma membrane
stratum 2	4A	6729977	ENSTGUG00000002826	ENSTGUT00000002949	MSN	GO:0048471	cellular_component	perinuclear region of cytoplasm
stratum 2	4A	6729977	ENSTGUG00000002826	ENSTGUT00000002949	MSN	GO:0045177	cellular_component	apical part of cell
stratum 2	4A	6729977	ENSTGUG00000002826	ENSTGUT00000002949	MSN	GO:0071394	biological_process	cellular response to testosterone stimulus
stratum 2	4A	6729977	ENSTGUG00000002826	ENSTGUT00000002949	MSN	GO:0050839	molecular_function	cell adhesion molecule binding
stratum 2	4A	6729977	ENSTGUG00000002826	ENSTGUT00000002949	MSN	GO:0016324	cellular_component	apical plasma membrane
stratum 2	4A	6729977	ENSTGUG00000002826	ENSTGUT00000002949	MSN	GO:1902115	biological_process	regulation of organelle assembly
stratum 2	4A	6729977	ENSTGUG00000002826	ENSTGUT00000002949	MSN	GO:0005925	cellular_component	focal adhesion
stratum 2	4A	6729977	ENSTGUG00000002826	ENSTGUT00000002949	MSN	GO:0071437	cellular_component	invadopodium
stratum 2	4A	6729977	ENSTGUG00000002826	ENSTGUT00000002949	MSN	GO:0003779	molecular_function	actin binding
stratum 2	4A	6729977	ENSTGUG00000002826	ENSTGUT00000002949	MSN	GO:0043209	cellular_component	myelin sheath
stratum 2	4A	6729977	ENSTGUG00000002826	ENSTGUT00000002949	MSN	GO:0001931	cellular_component	uropod
stratum 2	4A	6729977	ENSTGUG00000002826	ENSTGUT00000002949	MSN	GO:0031143	cellular_component	pseudopodium
stratum 2	4A	6729977	ENSTGUG00000002826	ENSTGUT00000002949	MSN	GO:1903364	biological_process	positive regulation of cellular protein catabolic process
stratum 2	4A	6729977	ENSTGUG00000002826	ENSTGUT00000002949	MSN	GO:0061028	biological_process	establishment of endothelial barrier
stratum 2	4A	6729977	ENSTGUG00000002826	ENSTGUT00000002949	MSN	GO:0005886	cellular_component	plasma membrane
stratum 2	4A	6729977	ENSTGUG00000002826	ENSTGUT00000002949	MSN	GO:2000401	biological_process	regulation of lymphocyte migration
stratum 2	4A	6729977	ENSTGUG00000002826	ENSTGUT00000002949	MSN	GO:1902966	biological_process	positive regulation of protein localization to early endosome
stratum 2	4A	6729977	ENSTGUG00000002826	ENSTGUT00000002949	MSN	GO:0008361	biological_process	regulation of cell size
stratum 2	4A	6729977	ENSTGUG00000002826	ENSTGUT00000002949	MSN	GO:0030175	cellular_component	filopodium
stratum 2	4A	6729977	ENSTGUG00000002826	ENSTGUT00000002949	MSN	GO:2000643	biological_process	positive regulation of early endosome to late endosome transport
stratum 5a	3	14191156	ENSTGUG00000003261	ENSTGUT00000003488	UBR2	GO:0032007	biological_process	negative regulation of TOR signaling
stratum 5a	3	14191156	ENSTGUG00000003261	ENSTGUT00000003488	UBR2	GO:0010529	biological_process	negative regulation of transposition
stratum 5a	3	14191156	ENSTGUG00000003261	ENSTGUT00000003488	UBR2	GO:0030163	biological_process	protein catabolic process
stratum 5a	3	14191156	ENSTGUG00000003261	ENSTGUT00000003488	UBR2	GO:0070728	molecular_function	leucine binding
stratum 5a	3	14191156	ENSTGUG00000003261	ENSTGUT00000003488	UBR2	GO:0006511	biological_process	ubiquitin-dependent protein catabolic process
stratum 5a	3	14191156	ENSTGUG00000003261	ENSTGUT00000003488	UBR2	GO:0061630	molecular_function	ubiquitin protein ligase activity
stratum 5a	3	14191156	ENSTGUG00000003261	ENSTGUT00000003488	UBR2	GO:0006342	biological_process	chromatin silencing
stratum 5a	3	14191156	ENSTGUG00000003261	ENSTGUT00000003488	UBR2	GO:0000785	cellular_component	chromatin
stratum 5a	3	14191156	ENSTGUG00000003261	ENSTGUT00000003488	UBR2	GO:0000151	cellular_component	ubiquitin ligase complex
stratum 5a	3	14191156	ENSTGUG00000003261	ENSTGUT00000003488	UBR2	GO:0007131	biological_process	reciprocal meiotic recombination
stratum 5a	3	14191156	ENSTGUG00000003261	ENSTGUT00000003488	UBR2	GO:0007283	biological_process	spermatogenesis
stratum 5a	3	14191156	ENSTGUG00000003261	ENSTGUT00000003488	UBR2	GO:0071233	biological_process	cellular response to leucine
stratum 5a	3	14191156	ENSTGUG00000003261	ENSTGUT00000003488	UBR2	GO:0007141	biological_process	male meiosis I
stratum 5a	3	14191156	ENSTGUG00000003261	ENSTGUT00000003488	UBR2	GO:0033522	biological_process	histone H2A ubiquitination
stratum 5a	3	14191156	ENSTGUG00000003261	ENSTGUT00000003488	UBR2	GO:0008270	molecular_function	zinc ion binding
stratum 5a	3	14191156	ENSTGUG00000003261	ENSTGUT00000003488	UBR2	GO:0007140	biological_process	male meiotic nuclear division
stratum 2	4A	9397163	ENSTGUG00000003361	ENSTGUT00000003543	SEPT6	GO:0008021	cellular_component	synaptic vesicle
stratum 2	4A	9397163	ENSTGUG00000003361	ENSTGUT00000003543	SEPT6	GO:0032173	cellular_component	septin collar
stratum 2	4A	9397163	ENSTGUG00000003361	ENSTGUT00000003543	SEPT6	GO:0043679	cellular_component	axon terminus
stratum 2	4A	9397163	ENSTGUG00000003361	ENSTGUT00000003543	SEPT6	GO:0032154	cellular_component	cleavage furrow
stratum 2	4A	9397163	ENSTGUG00000003361	ENSTGUT00000003543	SEPT6	GO:0031105	cellular_component	septin complex
stratum 2	4A	9397163	ENSTGUG00000003361	ENSTGUT00000003543	SEPT6	GO:0005940	cellular_component	septin ring
stratum 2	4A	9397163	ENSTGUG00000003361	ENSTGUT00000003543	SEPT6	GO:0000166	molecular_function	nucleotide binding
stratum 2	4A	9397163	ENSTGUG00000003361	ENSTGUT00000003543	SEPT6	GO:0005525	molecular_function	GTP binding
stratum 2	4A	9397163	ENSTGUG00000003361	ENSTGUT00000003543	SEPT6	GO:0097227	cellular_component	sperm annulus
stratum 1	Z	56270589	ENSTGUG00000003844	ENSTGUT00000003992	LHFPL2	GO:0016020	cellular_component	membrane
stratum 1	Z	56270589	ENSTGUG00000003844	ENSTGUT00000003992	LHFPL2	GO:0046546	biological_process	development of primary male sexual characteristics
stratum 1	Z	56270589	ENSTGUG00000003844	ENSTGUT00000003992	LHFPL2	GO:0046545	biological_process	development of primary female sexual characteristics
stratum 1	Z	56270589	ENSTGUG00000003844	ENSTGUT00000003992	LHFPL2	GO:0016021	cellular_component	integral component of membrane
stratum 1	Z	56270589	ENSTGUG00000003844	ENSTGUT00000003992	LHFPL2	GO:1905516	biological_process	positive regulation of fertilization
stratum 1	Z	56938915	ENSTGUG00000004054	ENSTGUT00000004232	CRHBP	GO:1900011	biological_process	negative regulation of corticotropin-releasing hormone receptor activity
stratum 1	Z	56938915	ENSTGUG00000004054	ENSTGUT00000004232	CRHBP	GO:0048149	biological_process	behavioral response to ethanol
stratum 1	Z	56938915	ENSTGUG00000004054	ENSTGUT00000004232	CRHBP	GO:0030141	cellular_component	secretory granule
stratum 1	Z	56938915	ENSTGUG00000004054	ENSTGUT00000004232	CRHBP	GO:0051460	biological_process	negative regulation of corticotropin secretion
stratum 1	Z	56938915	ENSTGUG00000004054	ENSTGUT00000004232	CRHBP	GO:0005622	cellular_component	intracellular
stratum 1	Z	56938915	ENSTGUG00000004054	ENSTGUT00000004232	CRHBP	GO:0051459	biological_process	regulation of corticotropin secretion
stratum 1	Z	56938915	ENSTGUG00000004054	ENSTGUT00000004232	CRHBP	GO:0051424	molecular_function	corticotropin-releasing hormone binding
stratum 1	Z	56938915	ENSTGUG00000004054	ENSTGUT00000004232	CRHBP	GO:0005634	cellular_component	nucleus
stratum 1	Z	56938915	ENSTGUG00000004054	ENSTGUT00000004232	CRHBP	GO:0071320	biological_process	cellular response to cAMP
stratum 1	Z	56938915	ENSTGUG00000004054	ENSTGUT00000004232	CRHBP	GO:0045055	biological_process	regulated exocytosis
stratum 1	Z	56938915	ENSTGUG00000004054	ENSTGUT00000004232	CRHBP	GO:0006954	biological_process	inflammatory response
stratum 1	Z	56938915	ENSTGUG00000004054	ENSTGUT00000004232	CRHBP	GO:0080135	biological_process	regulation of cellular response to stress
stratum 1	Z	56938915	ENSTGUG00000004054	ENSTGUT00000004232	CRHBP	GO:0001963	biological_process	synaptic transmission, dopaminergic
stratum 1	Z	56938915	ENSTGUG00000004054	ENSTGUT00000004232	CRHBP	GO:0005615	cellular_component	extracellular space
stratum 1	Z	56938915	ENSTGUG00000004054	ENSTGUT00000004232	CRHBP	GO:0042445	biological_process	hormone metabolic process
stratum 1	Z	56938915	ENSTGUG00000004054	ENSTGUT00000004232	CRHBP	GO:2000310	biological_process	regulation of NMDA receptor activity
stratum 1	Z	56938915	ENSTGUG00000004054	ENSTGUT00000004232	CRHBP	GO:0071277	biological_process	cellular response to calcium ion
stratum 1	Z	56938915	ENSTGUG00000004054	ENSTGUT00000004232	CRHBP	GO:0005576	cellular_component	extracellular region
stratum 1	Z	56938915	ENSTGUG00000004054	ENSTGUT00000004232	CRHBP	GO:0071392	biological_process	cellular response to estradiol stimulus
stratum 1	Z	56938915	ENSTGUG00000004054	ENSTGUT00000004232	CRHBP	GO:0035690	biological_process	cellular response to drug
stratum 1	Z	56938915	ENSTGUG00000004054	ENSTGUT00000004232	CRHBP	GO:0002125	biological_process	maternal aggressive behavior
stratum 1	Z	56938915	ENSTGUG00000004054	ENSTGUT00000004232	CRHBP	GO:0071356	biological_process	cellular response to tumor necrosis factor
stratum 1	Z	56938915	ENSTGUG00000004054	ENSTGUT00000004232	CRHBP	GO:0009755	biological_process	hormone-mediated signaling pathway
stratum 1	Z	56938915	ENSTGUG00000004054	ENSTGUT00000004232	CRHBP	GO:0071391	biological_process	cellular response to estrogen stimulus
stratum 1	Z	56938915	ENSTGUG00000004054	ENSTGUT00000004232	CRHBP	GO:0035865	biological_process	cellular response to potassium ion
stratum 1	Z	56938915	ENSTGUG00000004054	ENSTGUT00000004232	CRHBP	GO:0097211	biological_process	cellular response to gonadotropin-releasing hormone
stratum 1	Z	58224777	ENSTGUG00000004334	ENSTGUT00000004518	RPS6	GO:0000278	biological_process	mitotic cell cycle
stratum 1	Z	58224777	ENSTGUG00000004334	ENSTGUT00000004518	RPS6	GO:0019901	molecular_function	protein kinase binding
stratum 1	Z	58224777	ENSTGUG00000004334	ENSTGUT00000004518	RPS6	GO:0003735	molecular_function	structural constituent of ribosome
stratum 1	Z	58224777	ENSTGUG00000004334	ENSTGUT00000004518	RPS6	GO:0006364	biological_process	rRNA processing
stratum 1	Z	58224777	ENSTGUG00000004334	ENSTGUT00000004518	RPS6	GO:0022605	biological_process	mammalian oogenesis stage
stratum 1	Z	58224777	ENSTGUG00000004334	ENSTGUT00000004518	RPS6	GO:0005829	cellular_component	cytosol
stratum 1	Z	58224777	ENSTGUG00000004334	ENSTGUT00000004518	RPS6	GO:0043065	biological_process	positive regulation of apoptotic process
stratum 1	Z	58224777	ENSTGUG00000004334	ENSTGUT00000004518	RPS6	GO:0005737	cellular_component	cytoplasm
stratum 1	Z	58224777	ENSTGUG00000004334	ENSTGUT00000004518	RPS6	GO:0007369	biological_process	gastrulation
stratum 1	Z	58224777	ENSTGUG00000004334	ENSTGUT00000004518	RPS6	GO:0000082	biological_process	G1/S transition of mitotic cell cycle
stratum 1	Z	58224777	ENSTGUG00000004334	ENSTGUT00000004518	RPS6	GO:0005783	cellular_component	endoplasmic reticulum
stratum 1	Z	58224777	ENSTGUG00000004334	ENSTGUT00000004518	RPS6	GO:0005622	cellular_component	intracellular
stratum 1	Z	58224777	ENSTGUG00000004334	ENSTGUT00000004518	RPS6	GO:0006924	biological_process	activation-induced cell death of T cells
stratum 1	Z	58224777	ENSTGUG00000004334	ENSTGUT00000004518	RPS6	GO:0005844	cellular_component	polysome
stratum 1	Z	58224777	ENSTGUG00000004334	ENSTGUT00000004518	RPS6	GO:0002309	biological_process	T cell proliferation involved in immune response
stratum 1	Z	58224777	ENSTGUG00000004334	ENSTGUT00000004518	RPS6	GO:0048821	biological_process	erythrocyte development
stratum 1	Z	58224777	ENSTGUG00000004334	ENSTGUT00000004518	RPS6	GO:0006412	biological_process	translation
stratum 1	Z	58224777	ENSTGUG00000004334	ENSTGUT00000004518	RPS6	GO:0005840	cellular_component	ribosome
stratum 1	Z	58224777	ENSTGUG00000004334	ENSTGUT00000004518	RPS6	GO:0031929	biological_process	TOR signaling
stratum 1	Z	58224777	ENSTGUG00000004334	ENSTGUT00000004518	RPS6	GO:0015935	cellular_component	small ribosomal subunit
stratum 1	Z	58224777	ENSTGUG00000004334	ENSTGUT00000004518	RPS6	GO:1990904	cellular_component	ribonucleoprotein complex
stratum 1	Z	58224777	ENSTGUG00000004334	ENSTGUT00000004518	RPS6	GO:0042274	biological_process	ribosomal small subunit biogenesis
stratum 1	Z	58224777	ENSTGUG00000004334	ENSTGUT00000004518	RPS6	GO:0043066	biological_process	negative regulation of apoptotic process
stratum 1	Z	58224777	ENSTGUG00000004334	ENSTGUT00000004518	RPS6	GO:0033077	biological_process	T cell differentiation in thymus
stratum 1	Z	58224777	ENSTGUG00000004334	ENSTGUT00000004518	RPS6	GO:0005730	cellular_component	nucleolus
stratum 1	Z	58224777	ENSTGUG00000004334	ENSTGUT00000004518	RPS6	GO:0048471	cellular_component	perinuclear region of cytoplasm
stratum 1	Z	58224777	ENSTGUG00000004334	ENSTGUT00000004518	RPS6	GO:0007093	biological_process	mitotic cell cycle checkpoint
stratum 1	Z	58224777	ENSTGUG00000004334	ENSTGUT00000004518	RPS6	GO:0036464	cellular_component	cytoplasmic ribonucleoprotein granule
stratum 1	Z	58224777	ENSTGUG00000004334	ENSTGUT00000004518	RPS6	GO:0044297	cellular_component	cell body
stratum 1	Z	58224777	ENSTGUG00000004334	ENSTGUT00000004518	RPS6	GO:0005634	cellular_component	nucleus
stratum 1	Z	58224777	ENSTGUG00000004334	ENSTGUT00000004518	RPS6	GO:0042593	biological_process	glucose homeostasis
stratum 1	Z	58224777	ENSTGUG00000004334	ENSTGUT00000004518	RPS6	GO:0022627	cellular_component	cytosolic small ribosomal subunit
stratum 1	Z	58224777	ENSTGUG00000004334	ENSTGUT00000004518	RPS6	GO:0030425	cellular_component	dendrite
stratum 3	3	19977883	ENSTGUG00000004930	ENSTGUT00000005125	MEA1	GO:0007283	biological_process	spermatogenesis
stratum 3	3	19977883	ENSTGUG00000004930	ENSTGUT00000005125	MEA1	GO:0005737	cellular_component	cytoplasm
stratum 3	3	20582444	ENSTGUG00000005402	ENSTGUT00000005612	LBH	GO:1904677	biological_process	positive regulation of somatic stem cell division
stratum 3	3	20582444	ENSTGUG00000005402	ENSTGUT00000005612	LBH	GO:0010468	biological_process	regulation of gene expression
stratum 3	3	20582444	ENSTGUG00000005402	ENSTGUT00000005612	LBH	GO:0006351	biological_process	transcription, DNA-templated
stratum 3	3	20582444	ENSTGUG00000005402	ENSTGUT00000005612	LBH	GO:0005737	cellular_component	cytoplasm
stratum 3	3	20582444	ENSTGUG00000005402	ENSTGUT00000005612	LBH	GO:0005634	cellular_component	nucleus
stratum 3	3	20582444	ENSTGUG00000005402	ENSTGUT00000005612	LBH	GO:0033147	biological_process	negative regulation of intracellular estrogen receptor signaling pathway
stratum 3	3	20582444	ENSTGUG00000005402	ENSTGUT00000005612	LBH	GO:0006355	biological_process	regulation of transcription, DNA-templated
stratum 3	3	20582444	ENSTGUG00000005402	ENSTGUT00000005612	LBH	GO:1904674	biological_process	positive regulation of somatic stem cell population maintenance
stratum 3	3	20582444	ENSTGUG00000005402	ENSTGUT00000005612	LBH	GO:2000737	biological_process	negative regulation of stem cell differentiation
stratum 3	3	20582444	ENSTGUG00000005402	ENSTGUT00000005612	LBH	GO:2000103	biological_process	positive regulation of mammary stem cell proliferation
stratum 3	3	20582444	ENSTGUG00000005402	ENSTGUT00000005612	LBH	GO:0045893	biological_process	positive regulation of transcription, DNA-templated
stratum 3	3	21167825	ENSTGUG00000005502	ENSTGUT00000005767	MSH2	GO:0032300	cellular_component	mismatch repair complex
stratum 3	3	21167825	ENSTGUG00000005502	ENSTGUT00000005767	MSH2	GO:0032181	molecular_function	dinucleotide repeat insertion binding
stratum 3	3	21167825	ENSTGUG00000005502	ENSTGUT00000005767	MSH2	GO:0030983	molecular_function	mismatched DNA binding
stratum 3	3	21167825	ENSTGUG00000005502	ENSTGUT00000005767	MSH2	GO:0019901	molecular_function	protein kinase binding
stratum 3	3	21167825	ENSTGUG00000005502	ENSTGUT00000005767	MSH2	GO:0007050	biological_process	cell cycle arrest
stratum 3	3	21167825	ENSTGUG00000005502	ENSTGUT00000005767	MSH2	GO:0043531	molecular_function	ADP binding
stratum 3	3	21167825	ENSTGUG00000005502	ENSTGUT00000005767	MSH2	GO:0032139	molecular_function	dinucleotide insertion or deletion binding
stratum 3	3	21167825	ENSTGUG00000005502	ENSTGUT00000005767	MSH2	GO:0002204	biological_process	somatic recombination of immunoglobulin genes involved in immune response
stratum 3	3	21167825	ENSTGUG00000005502	ENSTGUT00000005767	MSH2	GO:0032137	molecular_function	guanine/thymine mispair binding
stratum 3	3	21167825	ENSTGUG00000005502	ENSTGUT00000005767	MSH2	GO:0003684	molecular_function	damaged DNA binding
stratum 3	3	21167825	ENSTGUG00000005502	ENSTGUT00000005767	MSH2	GO:0006119	biological_process	oxidative phosphorylation
stratum 3	3	21167825	ENSTGUG00000005502	ENSTGUT00000005767	MSH2	GO:0019899	molecular_function	enzyme binding
stratum 3	3	21167825	ENSTGUG00000005502	ENSTGUT00000005767	MSH2	GO:0042803	molecular_function	protein homodimerization activity
stratum 3	3	21167825	ENSTGUG00000005502	ENSTGUT00000005767	MSH2	GO:0008584	biological_process	male gonad development
stratum 3	3	21167825	ENSTGUG00000005502	ENSTGUT00000005767	MSH2	GO:0008630	biological_process	intrinsic apoptotic signaling pathway in response to DNA damage
stratum 3	3	21167825	ENSTGUG00000005502	ENSTGUT00000005767	MSH2	GO:0032143	molecular_function	single thymine insertion binding
stratum 3	3	21167825	ENSTGUG00000005502	ENSTGUT00000005767	MSH2	GO:0006302	biological_process	double-strand break repair
stratum 3	3	21167825	ENSTGUG00000005502	ENSTGUT00000005767	MSH2	GO:0006301	biological_process	postreplication repair
stratum 3	3	21167825	ENSTGUG00000005502	ENSTGUT00000005767	MSH2	GO:0032357	molecular_function	oxidized purine DNA binding
stratum 3	3	21167825	ENSTGUG00000005502	ENSTGUT00000005767	MSH2	GO:0016446	biological_process	somatic hypermutation of immunoglobulin genes
stratum 3	3	21167825	ENSTGUG00000005502	ENSTGUT00000005767	MSH2	GO:0032142	molecular_function	single guanine insertion binding
stratum 3	3	21167825	ENSTGUG00000005502	ENSTGUT00000005767	MSH2	GO:0008340	biological_process	determination of adult lifespan
stratum 3	3	21167825	ENSTGUG00000005502	ENSTGUT00000005767	MSH2	GO:0000400	molecular_function	four-way junction DNA binding
stratum 3	3	21167825	ENSTGUG00000005502	ENSTGUT00000005767	MSH2	GO:0003690	molecular_function	double-stranded DNA binding
stratum 3	3	21167825	ENSTGUG00000005502	ENSTGUT00000005767	MSH2	GO:0016887	molecular_function	ATPase activity
stratum 3	3	21167825	ENSTGUG00000005502	ENSTGUT00000005767	MSH2	GO:0016447	biological_process	somatic recombination of immunoglobulin gene segments
stratum 3	3	21167825	ENSTGUG00000005502	ENSTGUT00000005767	MSH2	GO:0007281	biological_process	germ cell development
stratum 3	3	21167825	ENSTGUG00000005502	ENSTGUT00000005767	MSH2	GO:0030183	biological_process	B cell differentiation
stratum 3	3	21167825	ENSTGUG00000005502	ENSTGUT00000005767	MSH2	GO:0048298	biological_process	positive regulation of isotype switching to IgA isotypes
stratum 3	3	21167825	ENSTGUG00000005502	ENSTGUT00000005767	MSH2	GO:0006298	biological_process	mismatch repair
stratum 3	3	21167825	ENSTGUG00000005502	ENSTGUT00000005767	MSH2	GO:0003697	molecular_function	single-stranded DNA binding
stratum 3	3	21167825	ENSTGUG00000005502	ENSTGUT00000005767	MSH2	GO:0045190	biological_process	isotype switching
stratum 3	3	21167825	ENSTGUG00000005502	ENSTGUT00000005767	MSH2	GO:0019237	molecular_function	centromeric DNA binding
stratum 3	3	21167825	ENSTGUG00000005502	ENSTGUT00000005767	MSH2	GO:0048304	biological_process	positive regulation of isotype switching to IgG isotypes
stratum 3	3	21167825	ENSTGUG00000005502	ENSTGUT00000005767	MSH2	GO:0032301	cellular_component	MutSalpha complex
stratum 3	3	21167825	ENSTGUG00000005502	ENSTGUT00000005767	MSH2	GO:0010224	biological_process	response to UV-B
stratum 3	3	21167825	ENSTGUG00000005502	ENSTGUT00000005767	MSH2	GO:0005634	cellular_component	nucleus
stratum 3	3	21167825	ENSTGUG00000005502	ENSTGUT00000005767	MSH2	GO:0032302	cellular_component	MutSbeta complex
stratum 3	3	21167825	ENSTGUG00000005502	ENSTGUT00000005767	MSH2	GO:0000287	molecular_function	magnesium ion binding
stratum 3	3	21167825	ENSTGUG00000005502	ENSTGUT00000005767	MSH2	GO:0032405	molecular_function	MutLalpha complex binding
stratum 3	3	21167825	ENSTGUG00000005502	ENSTGUT00000005767	MSH2	GO:0010165	biological_process	response to X-ray
stratum 3	3	21167825	ENSTGUG00000005502	ENSTGUT00000005767	MSH2	GO:0045910	biological_process	negative regulation of DNA recombination
stratum 3	3	21167825	ENSTGUG00000005502	ENSTGUT00000005767	MSH2	GO:0005524	molecular_function	ATP binding
stratum 3	3	21167825	ENSTGUG00000005502	ENSTGUT00000005767	MSH2	GO:0051096	biological_process	positive regulation of helicase activity
stratum 3	3	21167825	ENSTGUG00000005502	ENSTGUT00000005767	MSH2	GO:0043570	biological_process	maintenance of DNA repeat elements
stratum 3	3	21167825	ENSTGUG00000005502	ENSTGUT00000005767	MSH2	GO:0008022	molecular_function	protein C-terminus binding
stratum 3	3	21167825	ENSTGUG00000005502	ENSTGUT00000005767	MSH2	GO:0000166	molecular_function	nucleotide binding
stratum 3	3	21167825	ENSTGUG00000005502	ENSTGUT00000005767	MSH2	GO:0006281	biological_process	DNA repair
stratum 3	3	21167825	ENSTGUG00000005502	ENSTGUT00000005767	MSH2	GO:0043524	biological_process	negative regulation of neuron apoptotic process
stratum 3	3	21167825	ENSTGUG00000005502	ENSTGUT00000005767	MSH2	GO:0003677	molecular_function	DNA binding
stratum 3	3	21167825	ENSTGUG00000005502	ENSTGUT00000005767	MSH2	GO:0031573	biological_process	intra-S DNA damage checkpoint
stratum 3	3	21167825	ENSTGUG00000005502	ENSTGUT00000005767	MSH2	GO:0006974	biological_process	cellular response to DNA damage stimulus
stratum 3	3	21167825	ENSTGUG00000005502	ENSTGUT00000005767	MSH2	GO:0042771	biological_process	intrinsic apoptotic signaling pathway in response to DNA damage by p53 class mediator
stratum 3	3	21167825	ENSTGUG00000005502	ENSTGUT00000005767	MSH2	GO:0019724	biological_process	B cell mediated immunity
stratum 1	Z	65330746	ENSTGUG00000005521	ENSTGUT00000005730	DMRT3	GO:0021521	biological_process	ventral spinal cord interneuron specification
stratum 1	Z	65330746	ENSTGUG00000005521	ENSTGUT00000005730	DMRT3	GO:0043565	molecular_function	sequence-specific DNA binding
stratum 1	Z	65330746	ENSTGUG00000005521	ENSTGUT00000005730	DMRT3	GO:0046872	molecular_function	metal ion binding
stratum 1	Z	65330746	ENSTGUG00000005521	ENSTGUT00000005730	DMRT3	GO:0006355	biological_process	regulation of transcription, DNA-templated
stratum 1	Z	65330746	ENSTGUG00000005521	ENSTGUT00000005730	DMRT3	GO:0046661	biological_process	male sex differentiation
stratum 1	Z	65330746	ENSTGUG00000005521	ENSTGUT00000005730	DMRT3	GO:0019226	biological_process	transmission of nerve impulse
stratum 1	Z	65330746	ENSTGUG00000005521	ENSTGUT00000005730	DMRT3	GO:0042487	biological_process	regulation of odontogenesis of dentin-containing tooth
stratum 1	Z	65330746	ENSTGUG00000005521	ENSTGUT00000005730	DMRT3	GO:0003700	molecular_function	DNA binding transcription factor activity
stratum 1	Z	65330746	ENSTGUG00000005521	ENSTGUT00000005730	DMRT3	GO:0005634	cellular_component	nucleus
stratum 1	Z	65330746	ENSTGUG00000005521	ENSTGUT00000005730	DMRT3	GO:0046982	molecular_function	protein heterodimerization activity
stratum 1	Z	65330746	ENSTGUG00000005521	ENSTGUT00000005730	DMRT3	GO:0003677	molecular_function	DNA binding
stratum 1	Z	65330746	ENSTGUG00000005521	ENSTGUT00000005730	DMRT3	GO:0007628	biological_process	adult walking behavior
stratum 1	Z	65369688	ENSTGUG00000005524	ENSTGUT00000005739	DMRT1	GO:0005634	cellular_component	nucleus
stratum 1	Z	65369688	ENSTGUG00000005524	ENSTGUT00000005739	DMRT1	GO:2000020	biological_process	positive regulation of male gonad development
stratum 1	Z	65369688	ENSTGUG00000005524	ENSTGUT00000005739	DMRT1	GO:0008354	biological_process	germ cell migration
stratum 1	Z	65369688	ENSTGUG00000005524	ENSTGUT00000005739	DMRT1	GO:0005737	cellular_component	cytoplasm
stratum 1	Z	65369688	ENSTGUG00000005524	ENSTGUT00000005739	DMRT1	GO:0008584	biological_process	male gonad development
stratum 1	Z	65369688	ENSTGUG00000005524	ENSTGUT00000005739	DMRT1	GO:1900107	biological_process	regulation of nodal signaling pathway
stratum 1	Z	65369688	ENSTGUG00000005524	ENSTGUT00000005739	DMRT1	GO:0045835	biological_process	negative regulation of meiotic nuclear division
stratum 1	Z	65369688	ENSTGUG00000005524	ENSTGUT00000005739	DMRT1	GO:0042802	molecular_function	identical protein binding
stratum 1	Z	65369688	ENSTGUG00000005524	ENSTGUT00000005739	DMRT1	GO:0001228	molecular_function	transcriptional activator activity, RNA polymerase II transcription regulatory region sequence-specific DNA binding
stratum 1	Z	65369688	ENSTGUG00000005524	ENSTGUT00000005739	DMRT1	GO:0060009	biological_process	Sertoli cell development
stratum 1	Z	65369688	ENSTGUG00000005524	ENSTGUT00000005739	DMRT1	GO:0002176	biological_process	male germ cell proliferation
stratum 1	Z	65369688	ENSTGUG00000005524	ENSTGUT00000005739	DMRT1	GO:0043565	molecular_function	sequence-specific DNA binding
stratum 1	Z	65369688	ENSTGUG00000005524	ENSTGUT00000005739	DMRT1	GO:0060903	biological_process	positive regulation of meiosis I
stratum 1	Z	65369688	ENSTGUG00000005524	ENSTGUT00000005739	DMRT1	GO:0006355	biological_process	regulation of transcription, DNA-templated
stratum 1	Z	65369688	ENSTGUG00000005524	ENSTGUT00000005739	DMRT1	GO:0046982	molecular_function	protein heterodimerization activity
stratum 1	Z	65369688	ENSTGUG00000005524	ENSTGUT00000005739	DMRT1	GO:0000987	molecular_function	proximal promoter sequence-specific DNA binding
stratum 1	Z	65369688	ENSTGUG00000005524	ENSTGUT00000005739	DMRT1	GO:0030238	biological_process	male sex determination
stratum 1	Z	65369688	ENSTGUG00000005524	ENSTGUT00000005739	DMRT1	GO:0007283	biological_process	spermatogenesis
stratum 1	Z	65369688	ENSTGUG00000005524	ENSTGUT00000005739	DMRT1	GO:0046661	biological_process	male sex differentiation
stratum 1	Z	65369688	ENSTGUG00000005524	ENSTGUT00000005739	DMRT1	GO:0000977	molecular_function	RNA polymerase II regulatory region sequence-specific DNA binding
stratum 1	Z	65369688	ENSTGUG00000005524	ENSTGUT00000005739	DMRT1	GO:0042803	molecular_function	protein homodimerization activity
stratum 1	Z	65369688	ENSTGUG00000005524	ENSTGUT00000005739	DMRT1	GO:0003682	molecular_function	chromatin binding
stratum 1	Z	65369688	ENSTGUG00000005524	ENSTGUT00000005739	DMRT1	GO:0045840	biological_process	positive regulation of mitotic nuclear division
stratum 1	Z	65369688	ENSTGUG00000005524	ENSTGUT00000005739	DMRT1	GO:0045944	biological_process	positive regulation of transcription by RNA polymerase II
stratum 1	Z	65369688	ENSTGUG00000005524	ENSTGUT00000005739	DMRT1	GO:0006366	biological_process	transcription by RNA polymerase II
stratum 1	Z	65369688	ENSTGUG00000005524	ENSTGUT00000005739	DMRT1	GO:0003006	biological_process	developmental process involved in reproduction
stratum 1	Z	65369688	ENSTGUG00000005524	ENSTGUT00000005739	DMRT1	GO:0060008	biological_process	Sertoli cell differentiation
stratum 1	Z	65369688	ENSTGUG00000005524	ENSTGUT00000005739	DMRT1	GO:0000902	biological_process	cell morphogenesis
stratum 1	Z	65369688	ENSTGUG00000005524	ENSTGUT00000005739	DMRT1	GO:0003700	molecular_function	DNA binding transcription factor activity
stratum 1	Z	65369688	ENSTGUG00000005524	ENSTGUT00000005739	DMRT1	GO:0000122	biological_process	negative regulation of transcription by RNA polymerase II
stratum 1	Z	65369688	ENSTGUG00000005524	ENSTGUT00000005739	DMRT1	GO:0048599	biological_process	oocyte development
stratum 3	3	21656586	ENSTGUG00000005679	ENSTGUT00000005909	NA	GO:0038106	molecular_function	choriogonadotropin hormone binding
stratum 3	3	21656586	ENSTGUG00000005679	ENSTGUT00000005909	NA	GO:0016500	molecular_function	protein-hormone receptor activity
stratum 3	3	21656586	ENSTGUG00000005679	ENSTGUT00000005909	NA	GO:0060065	biological_process	uterus development
stratum 3	3	21656586	ENSTGUG00000005679	ENSTGUT00000005909	NA	GO:0001541	biological_process	ovarian follicle development
stratum 3	3	21656586	ENSTGUG00000005679	ENSTGUT00000005909	NA	GO:0007189	biological_process	adenylate cyclase-activating G-protein coupled receptor signaling pathway
stratum 3	3	21656586	ENSTGUG00000005679	ENSTGUT00000005909	NA	GO:0046544	biological_process	development of secondary male sexual characteristics
stratum 3	3	21656586	ENSTGUG00000005679	ENSTGUT00000005909	NA	GO:0004964	molecular_function	luteinizing hormone receptor activity
stratum 3	3	21656586	ENSTGUG00000005679	ENSTGUT00000005909	NA	GO:0005622	cellular_component	intracellular
stratum 3	3	21656586	ENSTGUG00000005679	ENSTGUT00000005909	NA	GO:0007186	biological_process	G-protein coupled receptor signaling pathway
stratum 3	3	21656586	ENSTGUG00000005679	ENSTGUT00000005909	NA	GO:0007200	biological_process	phospholipase C-activating G-protein coupled receptor signaling pathway
stratum 3	3	21656586	ENSTGUG00000005679	ENSTGUT00000005909	NA	GO:0035472	molecular_function	choriogonadotropin hormone receptor activity
stratum 3	3	21656586	ENSTGUG00000005679	ENSTGUT00000005909	NA	GO:0005886	cellular_component	plasma membrane
stratum 3	3	21656586	ENSTGUG00000005679	ENSTGUT00000005909	NA	GO:0022602	biological_process	ovulation cycle process
stratum 3	3	21656586	ENSTGUG00000005679	ENSTGUT00000005909	NA	GO:0016021	cellular_component	integral component of membrane
stratum 3	3	21656586	ENSTGUG00000005679	ENSTGUT00000005909	NA	GO:0007165	biological_process	signal transduction
stratum 3	3	21656586	ENSTGUG00000005679	ENSTGUT00000005909	NA	GO:0004930	molecular_function	G-protein coupled receptor activity
stratum 3	3	21656586	ENSTGUG00000005679	ENSTGUT00000005909	NA	GO:0008585	biological_process	female gonad development
stratum 3	3	21656586	ENSTGUG00000005679	ENSTGUT00000005909	NA	GO:0007190	biological_process	activation of adenylate cyclase activity
stratum 3	3	21656586	ENSTGUG00000005679	ENSTGUT00000005909	NA	GO:0032962	biological_process	positive regulation of inositol trisphosphate biosynthetic process
stratum 3	3	21656586	ENSTGUG00000005679	ENSTGUT00000005909	NA	GO:0071371	biological_process	cellular response to gonadotropin stimulus
stratum 3	3	21656586	ENSTGUG00000005679	ENSTGUT00000005909	NA	GO:0008584	biological_process	male gonad development
stratum 3	3	21656586	ENSTGUG00000005679	ENSTGUT00000005909	NA	GO:0005887	cellular_component	integral component of plasma membrane
stratum 3	3	21656586	ENSTGUG00000005679	ENSTGUT00000005909	NA	GO:0072520	biological_process	seminiferous tubule development
stratum 3	3	21656586	ENSTGUG00000005679	ENSTGUT00000005909	NA	GO:0042700	biological_process	luteinizing hormone signaling pathway
stratum 3	3	21656586	ENSTGUG00000005679	ENSTGUT00000005909	NA	GO:0007283	biological_process	spermatogenesis
stratum 3	3	21656586	ENSTGUG00000005679	ENSTGUT00000005909	NA	GO:0090030	biological_process	regulation of steroid hormone biosynthetic process
stratum 3	3	21656586	ENSTGUG00000005679	ENSTGUT00000005909	NA	GO:0016020	cellular_component	membrane
stratum 3	3	21774513	ENSTGUG00000005697	ENSTGUT00000005943	FSHR	GO:0007286	biological_process	spermatid development
stratum 3	3	21774513	ENSTGUG00000005697	ENSTGUT00000005943	FSHR	GO:0045670	biological_process	regulation of osteoclast differentiation
stratum 3	3	21774513	ENSTGUG00000005697	ENSTGUT00000005943	FSHR	GO:0033146	biological_process	regulation of intracellular estrogen receptor signaling pathway
stratum 3	3	21774513	ENSTGUG00000005697	ENSTGUT00000005943	FSHR	GO:0009992	biological_process	cellular water homeostasis
stratum 3	3	21774513	ENSTGUG00000005697	ENSTGUT00000005943	FSHR	GO:0007283	biological_process	spermatogenesis
stratum 3	3	21774513	ENSTGUG00000005697	ENSTGUT00000005943	FSHR	GO:0007200	biological_process	phospholipase C-activating G-protein coupled receptor signaling pathway
stratum 3	3	21774513	ENSTGUG00000005697	ENSTGUT00000005943	FSHR	GO:0043408	biological_process	regulation of MAPK cascade
stratum 3	3	21774513	ENSTGUG00000005697	ENSTGUT00000005943	FSHR	GO:0033044	biological_process	regulation of chromosome organization
stratum 3	3	21774513	ENSTGUG00000005697	ENSTGUT00000005943	FSHR	GO:0009986	cellular_component	cell surface
stratum 3	3	21774513	ENSTGUG00000005697	ENSTGUT00000005943	FSHR	GO:0007626	biological_process	locomotory behavior
stratum 3	3	21774513	ENSTGUG00000005697	ENSTGUT00000005943	FSHR	GO:0033148	biological_process	positive regulation of intracellular estrogen receptor signaling pathway
stratum 3	3	21774513	ENSTGUG00000005697	ENSTGUT00000005943	FSHR	GO:0004930	molecular_function	G-protein coupled receptor activity
stratum 3	3	21774513	ENSTGUG00000005697	ENSTGUT00000005943	FSHR	GO:0016500	molecular_function	protein-hormone receptor activity
stratum 3	3	21774513	ENSTGUG00000005697	ENSTGUT00000005943	FSHR	GO:0060011	biological_process	Sertoli cell proliferation
stratum 3	3	21774513	ENSTGUG00000005697	ENSTGUT00000005943	FSHR	GO:0007193	biological_process	adenylate cyclase-inhibiting G-protein coupled receptor signaling pathway
stratum 3	3	21774513	ENSTGUG00000005697	ENSTGUT00000005943	FSHR	GO:0045779	biological_process	negative regulation of bone resorption
stratum 3	3	21774513	ENSTGUG00000005697	ENSTGUT00000005943	FSHR	GO:0031175	biological_process	neuron projection development
stratum 3	3	21774513	ENSTGUG00000005697	ENSTGUT00000005943	FSHR	GO:0010640	biological_process	regulation of platelet-derived growth factor receptor signaling pathway
stratum 3	3	21774513	ENSTGUG00000005697	ENSTGUT00000005943	FSHR	GO:0022602	biological_process	ovulation cycle process
stratum 3	3	21774513	ENSTGUG00000005697	ENSTGUT00000005943	FSHR	GO:0035092	biological_process	sperm chromatin condensation
stratum 3	3	21774513	ENSTGUG00000005697	ENSTGUT00000005943	FSHR	GO:0007186	biological_process	G-protein coupled receptor signaling pathway
stratum 3	3	21774513	ENSTGUG00000005697	ENSTGUT00000005943	FSHR	GO:0071711	biological_process	basement membrane organization
stratum 3	3	21774513	ENSTGUG00000005697	ENSTGUT00000005943	FSHR	GO:0001541	biological_process	ovarian follicle development
stratum 3	3	21774513	ENSTGUG00000005697	ENSTGUT00000005943	FSHR	GO:0060408	biological_process	regulation of acetylcholine metabolic process
stratum 3	3	21774513	ENSTGUG00000005697	ENSTGUT00000005943	FSHR	GO:0005886	cellular_component	plasma membrane
stratum 3	3	21774513	ENSTGUG00000005697	ENSTGUT00000005943	FSHR	GO:0060065	biological_process	uterus development
stratum 3	3	21774513	ENSTGUG00000005697	ENSTGUT00000005943	FSHR	GO:0001545	biological_process	primary ovarian follicle growth
stratum 3	3	21774513	ENSTGUG00000005697	ENSTGUT00000005943	FSHR	GO:0060009	biological_process	Sertoli cell development
stratum 3	3	21774513	ENSTGUG00000005697	ENSTGUT00000005943	FSHR	GO:0007165	biological_process	signal transduction
stratum 3	3	21774513	ENSTGUG00000005697	ENSTGUT00000005943	FSHR	GO:0004963	molecular_function	follicle-stimulating hormone receptor activity
stratum 3	3	21774513	ENSTGUG00000005697	ENSTGUT00000005943	FSHR	GO:0032350	biological_process	regulation of hormone metabolic process
stratum 3	3	21774513	ENSTGUG00000005697	ENSTGUT00000005943	FSHR	GO:0016020	cellular_component	membrane
stratum 3	3	21774513	ENSTGUG00000005697	ENSTGUT00000005943	FSHR	GO:0001932	biological_process	regulation of protein phosphorylation
stratum 3	3	21774513	ENSTGUG00000005697	ENSTGUT00000005943	FSHR	GO:0042699	biological_process	follicle-stimulating hormone signaling pathway
stratum 3	3	21774513	ENSTGUG00000005697	ENSTGUT00000005943	FSHR	GO:0007188	biological_process	adenylate cyclase-modulating G-protein coupled receptor signaling pathway
stratum 3	3	21774513	ENSTGUG00000005697	ENSTGUT00000005943	FSHR	GO:0035093	biological_process	spermatogenesis, exchange of chromosomal proteins
stratum 3	3	21774513	ENSTGUG00000005697	ENSTGUT00000005943	FSHR	GO:0003073	biological_process	regulation of systemic arterial blood pressure
stratum 3	3	21774513	ENSTGUG00000005697	ENSTGUT00000005943	FSHR	GO:0016021	cellular_component	integral component of membrane
stratum 1	Z	66080530	ENSTGUG00000005717	ENSTGUT00000005941	ZNF366	GO:0000122	biological_process	negative regulation of transcription by RNA polymerase II
stratum 1	Z	66080530	ENSTGUG00000005717	ENSTGUT00000005941	ZNF366	GO:0030331	molecular_function	estrogen receptor binding
stratum 1	Z	66080530	ENSTGUG00000005717	ENSTGUT00000005941	ZNF366	GO:0033147	biological_process	negative regulation of intracellular estrogen receptor signaling pathway
stratum 1	Z	66080530	ENSTGUG00000005717	ENSTGUT00000005941	ZNF366	GO:0043627	biological_process	response to estrogen
stratum 1	Z	66080530	ENSTGUG00000005717	ENSTGUT00000005941	ZNF366	GO:0003714	molecular_function	transcription corepressor activity
stratum 1	Z	66080530	ENSTGUG00000005717	ENSTGUT00000005941	ZNF366	GO:0005634	cellular_component	nucleus
stratum 1	Z	66080530	ENSTGUG00000005717	ENSTGUT00000005941	ZNF366	GO:0003676	molecular_function	nucleic acid binding
stratum 1	Z	67083671	ENSTGUG00000005948	ENSTGUT00000006205	HEXB	GO:0046982	molecular_function	protein heterodimerization activity
stratum 1	Z	67083671	ENSTGUG00000005948	ENSTGUT00000006205	HEXB	GO:0048477	biological_process	oogenesis
stratum 1	Z	67083671	ENSTGUG00000005948	ENSTGUT00000006205	HEXB	GO:0102148	molecular_function	N-acetyl-beta-D-galactosaminidase activity
stratum 1	Z	67083671	ENSTGUG00000005948	ENSTGUT00000006205	HEXB	GO:0001501	biological_process	skeletal system development
stratum 1	Z	67083671	ENSTGUG00000005948	ENSTGUT00000006205	HEXB	GO:0005975	biological_process	carbohydrate metabolic process
stratum 1	Z	67083671	ENSTGUG00000005948	ENSTGUT00000006205	HEXB	GO:0019953	biological_process	sexual reproduction
stratum 1	Z	67083671	ENSTGUG00000005948	ENSTGUT00000006205	HEXB	GO:0031323	biological_process	regulation of cellular metabolic process
stratum 1	Z	67083671	ENSTGUG00000005948	ENSTGUT00000006205	HEXB	GO:0042803	molecular_function	protein homodimerization activity
stratum 1	Z	67083671	ENSTGUG00000005948	ENSTGUT00000006205	HEXB	GO:0006687	biological_process	glycosphingolipid metabolic process
stratum 1	Z	67083671	ENSTGUG00000005948	ENSTGUT00000006205	HEXB	GO:0008375	molecular_function	acetylglucosaminyltransferase activity
stratum 1	Z	67083671	ENSTGUG00000005948	ENSTGUT00000006205	HEXB	GO:0050905	biological_process	neuromuscular process
stratum 1	Z	67083671	ENSTGUG00000005948	ENSTGUT00000006205	HEXB	GO:0042582	cellular_component	azurophil granule
stratum 1	Z	67083671	ENSTGUG00000005948	ENSTGUT00000006205	HEXB	GO:0016020	cellular_component	membrane
stratum 1	Z	67083671	ENSTGUG00000005948	ENSTGUT00000006205	HEXB	GO:0004553	molecular_function	hydrolase activity, hydrolyzing O-glycosyl compounds
stratum 1	Z	67083671	ENSTGUG00000005948	ENSTGUT00000006205	HEXB	GO:0050885	biological_process	neuromuscular process controlling balance
stratum 1	Z	67083671	ENSTGUG00000005948	ENSTGUT00000006205	HEXB	GO:0009313	biological_process	oligosaccharide catabolic process
stratum 1	Z	67083671	ENSTGUG00000005948	ENSTGUT00000006205	HEXB	GO:0019915	biological_process	lipid storage
stratum 1	Z	67083671	ENSTGUG00000005948	ENSTGUT00000006205	HEXB	GO:0006689	biological_process	ganglioside catabolic process
stratum 1	Z	67083671	ENSTGUG00000005948	ENSTGUT00000006205	HEXB	GO:0005764	cellular_component	lysosome
stratum 1	Z	67083671	ENSTGUG00000005948	ENSTGUT00000006205	HEXB	GO:0045944	biological_process	positive regulation of transcription by RNA polymerase II
stratum 1	Z	67083671	ENSTGUG00000005948	ENSTGUT00000006205	HEXB	GO:0008360	biological_process	regulation of cell shape
stratum 1	Z	67083671	ENSTGUG00000005948	ENSTGUT00000006205	HEXB	GO:0007341	biological_process	penetration of zona pellucida
stratum 1	Z	67083671	ENSTGUG00000005948	ENSTGUT00000006205	HEXB	GO:0004563	molecular_function	beta-N-acetylhexosaminidase activity
stratum 1	Z	67083671	ENSTGUG00000005948	ENSTGUT00000006205	HEXB	GO:0001669	cellular_component	acrosomal vesicle
stratum 1	Z	67083671	ENSTGUG00000005948	ENSTGUT00000006205	HEXB	GO:0044267	biological_process	cellular protein metabolic process
stratum 1	Z	67083671	ENSTGUG00000005948	ENSTGUT00000006205	HEXB	GO:0042552	biological_process	myelination
stratum 1	Z	67083671	ENSTGUG00000005948	ENSTGUT00000006205	HEXB	GO:0006874	biological_process	cellular calcium ion homeostasis
stratum 1	Z	67083671	ENSTGUG00000005948	ENSTGUT00000006205	HEXB	GO:0005615	cellular_component	extracellular space
stratum 1	Z	67083671	ENSTGUG00000005948	ENSTGUT00000006205	HEXB	GO:0043615	biological_process	astrocyte cell migration
stratum 1	Z	67083671	ENSTGUG00000005948	ENSTGUT00000006205	HEXB	GO:0008654	biological_process	phospholipid biosynthetic process
stratum 1	Z	67083671	ENSTGUG00000005948	ENSTGUT00000006205	HEXB	GO:0030203	biological_process	glycosaminoglycan metabolic process
stratum 1	Z	67083671	ENSTGUG00000005948	ENSTGUT00000006205	HEXB	GO:0016798	molecular_function	hydrolase activity, acting on glycosyl bonds
stratum 1	Z	67083671	ENSTGUG00000005948	ENSTGUT00000006205	HEXB	GO:0016787	molecular_function	hydrolase activity
stratum 1	Z	67083671	ENSTGUG00000005948	ENSTGUT00000006205	HEXB	GO:0008152	biological_process	metabolic process
stratum 1	Z	67083671	ENSTGUG00000005948	ENSTGUT00000006205	HEXB	GO:0007626	biological_process	locomotory behavior
stratum 1	Z	67083671	ENSTGUG00000005948	ENSTGUT00000006205	HEXB	GO:0008049	biological_process	male courtship behavior
stratum 1	Z	67083671	ENSTGUG00000005948	ENSTGUT00000006205	HEXB	GO:0007040	biological_process	lysosome organization
stratum 1	Z	67083671	ENSTGUG00000005948	ENSTGUT00000006205	HEXB	GO:0007605	biological_process	sensory perception of sound
stratum 1	Z	67083671	ENSTGUG00000005948	ENSTGUT00000006205	HEXB	GO:0007338	biological_process	single fertilization
stratum 1	Z	68309658	ENSTGUG00000006372	ENSTGUT00000006634	RAD23B	GO:0005829	cellular_component	cytosol
stratum 1	Z	68309658	ENSTGUG00000006372	ENSTGUT00000006634	RAD23B	GO:0032434	biological_process	regulation of proteasomal ubiquitin-dependent protein catabolic process
stratum 1	Z	68309658	ENSTGUG00000006372	ENSTGUT00000006634	RAD23B	GO:0003684	molecular_function	damaged DNA binding
stratum 1	Z	68309658	ENSTGUG00000006372	ENSTGUT00000006634	RAD23B	GO:0005654	cellular_component	nucleoplasm
stratum 1	Z	68309658	ENSTGUG00000006372	ENSTGUT00000006634	RAD23B	GO:0071942	cellular_component	XPC complex
stratum 1	Z	68309658	ENSTGUG00000006372	ENSTGUT00000006634	RAD23B	GO:0006289	biological_process	nucleotide-excision repair
stratum 1	Z	68309658	ENSTGUG00000006372	ENSTGUT00000006634	RAD23B	GO:0000715	biological_process	nucleotide-excision repair, DNA damage recognition
stratum 1	Z	68309658	ENSTGUG00000006372	ENSTGUT00000006634	RAD23B	GO:0031593	molecular_function	polyubiquitin modification-dependent protein binding
stratum 1	Z	68309658	ENSTGUG00000006372	ENSTGUT00000006634	RAD23B	GO:0043161	biological_process	proteasome-mediated ubiquitin-dependent protein catabolic process
stratum 1	Z	68309658	ENSTGUG00000006372	ENSTGUT00000006634	RAD23B	GO:0007283	biological_process	spermatogenesis
stratum 1	Z	68309658	ENSTGUG00000006372	ENSTGUT00000006634	RAD23B	GO:0006974	biological_process	cellular response to DNA damage stimulus
stratum 1	Z	68309658	ENSTGUG00000006372	ENSTGUT00000006634	RAD23B	GO:0005634	cellular_component	nucleus
stratum 5a	3	31112096	ENSTGUG00000007947	ENSTGUT00000008279	TCTE1	GO:0097722	biological_process	sperm motility
stratum 5a	3	31112096	ENSTGUG00000007947	ENSTGUT00000008279	TCTE1	GO:0036126	cellular_component	sperm flagellum
stratum 5a	3	33932544	ENSTGUG00000008454	ENSTGUT00000008798	SRD5A2	GO:0030539	biological_process	male genitalia development
stratum 5a	3	33932544	ENSTGUG00000008454	ENSTGUT00000008798	SRD5A2	GO:0016627	molecular_function	oxidoreductase activity, acting on the CH-CH group of donors
stratum 5a	3	33932544	ENSTGUG00000008454	ENSTGUT00000008798	SRD5A2	GO:0003865	molecular_function	3-oxo-5-alpha-steroid 4-dehydrogenase activity
stratum 5a	3	33932544	ENSTGUG00000008454	ENSTGUT00000008798	SRD5A2	GO:0008202	biological_process	steroid metabolic process
stratum 5a	3	33932544	ENSTGUG00000008454	ENSTGUT00000008798	SRD5A2	GO:0030283	molecular_function	testosterone dehydrogenase [NAD(P)] activity
stratum 5a	3	33932544	ENSTGUG00000008454	ENSTGUT00000008798	SRD5A2	GO:0008584	biological_process	male gonad development
stratum 5a	3	33932544	ENSTGUG00000008454	ENSTGUT00000008798	SRD5A2	GO:0009917	molecular_function	sterol 5-alpha reductase activity
stratum 5a	3	33932544	ENSTGUG00000008454	ENSTGUT00000008798	SRD5A2	GO:0006702	biological_process	androgen biosynthetic process
stratum 5a	3	33932544	ENSTGUG00000008454	ENSTGUT00000008798	SRD5A2	GO:0061370	biological_process	testosterone biosynthetic process
stratum 5a	3	33932544	ENSTGUG00000008454	ENSTGUT00000008798	SRD5A2	GO:0006629	biological_process	lipid metabolic process
stratum 5a	3	33932544	ENSTGUG00000008454	ENSTGUT00000008798	SRD5A2	GO:0008209	biological_process	androgen metabolic process
stratum 5a	3	33932544	ENSTGUG00000008454	ENSTGUT00000008798	SRD5A2	GO:0016020	cellular_component	membrane
stratum 5a	3	33932544	ENSTGUG00000008454	ENSTGUT00000008798	SRD5A2	GO:0006694	biological_process	steroid biosynthetic process
stratum 5a	3	33932544	ENSTGUG00000008454	ENSTGUT00000008798	SRD5A2	GO:0055114	biological_process	oxidation-reduction process
stratum 5a	3	33932544	ENSTGUG00000008454	ENSTGUT00000008798	SRD5A2	GO:0016021	cellular_component	integral component of membrane
stratum 5a	3	33932544	ENSTGUG00000008454	ENSTGUT00000008798	SRD5A2	GO:0005737	cellular_component	cytoplasm
stratum 5a	3	35709376	ENSTGUG00000008691	ENSTGUT00000009085	STRN	GO:0016055	biological_process	Wnt signaling pathway
stratum 5a	3	35709376	ENSTGUG00000008691	ENSTGUT00000009085	STRN	GO:0044877	molecular_function	protein-containing complex binding
stratum 5a	3	35709376	ENSTGUG00000008691	ENSTGUT00000009085	STRN	GO:0030331	molecular_function	estrogen receptor binding
stratum 5a	3	35709376	ENSTGUG00000008691	ENSTGUT00000009085	STRN	GO:0000159	cellular_component	protein phosphatase type 2A complex
stratum 5a	3	35709376	ENSTGUG00000008691	ENSTGUT00000009085	STRN	GO:0008285	biological_process	negative regulation of cell proliferation
stratum 5a	3	35709376	ENSTGUG00000008691	ENSTGUT00000009085	STRN	GO:0005923	cellular_component	bicellular tight junction
stratum 5a	3	35709376	ENSTGUG00000008691	ENSTGUT00000009085	STRN	GO:0070016	molecular_function	armadillo repeat domain binding
stratum 5a	3	35709376	ENSTGUG00000008691	ENSTGUT00000009085	STRN	GO:0051721	molecular_function	protein phosphatase 2A binding
stratum 5a	3	35935094	ENSTGUG00000008796	ENSTGUT00000009158	CYP1B1	GO:0046427	biological_process	positive regulation of JAK-STAT cascade
stratum 5a	3	35935094	ENSTGUG00000008796	ENSTGUT00000009158	CYP1B1	GO:0008202	biological_process	steroid metabolic process
stratum 5a	3	35935094	ENSTGUG00000008796	ENSTGUT00000009158	CYP1B1	GO:0071407	biological_process	cellular response to organic cyclic compound
stratum 5a	3	35935094	ENSTGUG00000008796	ENSTGUT00000009158	CYP1B1	GO:0046466	biological_process	membrane lipid catabolic process
stratum 5a	3	35935094	ENSTGUG00000008796	ENSTGUT00000009158	CYP1B1	GO:0030199	biological_process	collagen fibril organization
stratum 5a	3	35935094	ENSTGUG00000008796	ENSTGUT00000009158	CYP1B1	GO:0008210	biological_process	estrogen metabolic process
stratum 5a	3	35935094	ENSTGUG00000008796	ENSTGUT00000009158	CYP1B1	GO:0043542	biological_process	endothelial cell migration
stratum 5a	3	35935094	ENSTGUG00000008796	ENSTGUT00000009158	CYP1B1	GO:0001525	biological_process	angiogenesis
stratum 5a	3	35935094	ENSTGUG00000008796	ENSTGUT00000009158	CYP1B1	GO:0033629	biological_process	negative regulation of cell adhesion mediated by integrin
stratum 5a	3	35935094	ENSTGUG00000008796	ENSTGUT00000009158	CYP1B1	GO:0008285	biological_process	negative regulation of cell proliferation
stratum 5a	3	35935094	ENSTGUG00000008796	ENSTGUT00000009158	CYP1B1	GO:0010575	biological_process	positive regulation of vascular endothelial growth factor production
stratum 5a	3	35935094	ENSTGUG00000008796	ENSTGUT00000009158	CYP1B1	GO:0009404	biological_process	toxin metabolic process
stratum 5a	3	35935094	ENSTGUG00000008796	ENSTGUT00000009158	CYP1B1	GO:0007155	biological_process	cell adhesion
stratum 5a	3	35935094	ENSTGUG00000008796	ENSTGUT00000009158	CYP1B1	GO:0006809	biological_process	nitric oxide biosynthetic process
stratum 5a	3	35935094	ENSTGUG00000008796	ENSTGUT00000009158	CYP1B1	GO:0032088	biological_process	negative regulation of NF-kappaB transcription factor activity
stratum 5a	3	35935094	ENSTGUG00000008796	ENSTGUT00000009158	CYP1B1	GO:0008631	biological_process	intrinsic apoptotic signaling pathway in response to oxidative stress
stratum 5a	3	35935094	ENSTGUG00000008796	ENSTGUT00000009158	CYP1B1	GO:0006805	biological_process	xenobiotic metabolic process
stratum 5a	3	35935094	ENSTGUG00000008796	ENSTGUT00000009158	CYP1B1	GO:0030336	biological_process	negative regulation of cell migration
stratum 5a	3	35935094	ENSTGUG00000008796	ENSTGUT00000009158	CYP1B1	GO:0042574	biological_process	retinal metabolic process
stratum 5a	3	35935094	ENSTGUG00000008796	ENSTGUT00000009158	CYP1B1	GO:0048514	biological_process	blood vessel morphogenesis
stratum 5a	3	35935094	ENSTGUG00000008796	ENSTGUT00000009158	CYP1B1	GO:0045766	biological_process	positive regulation of angiogenesis
stratum 5a	3	35935094	ENSTGUG00000008796	ENSTGUT00000009158	CYP1B1	GO:0002930	biological_process	trabecular meshwork development
stratum 5a	3	35935094	ENSTGUG00000008796	ENSTGUT00000009158	CYP1B1	GO:0070301	biological_process	cellular response to hydrogen peroxide
stratum 5a	3	35935094	ENSTGUG00000008796	ENSTGUT00000009158	CYP1B1	GO:0019369	biological_process	arachidonic acid metabolic process
stratum 5a	3	35935094	ENSTGUG00000008796	ENSTGUT00000009158	CYP1B1	GO:0061298	biological_process	retina vasculature development in camera-type eye
stratum 5a	3	35935094	ENSTGUG00000008796	ENSTGUT00000009158	CYP1B1	GO:0046872	molecular_function	metal ion binding
stratum 5a	3	35935094	ENSTGUG00000008796	ENSTGUT00000009158	CYP1B1	GO:2000377	biological_process	regulation of reactive oxygen species metabolic process
stratum 5a	3	35935094	ENSTGUG00000008796	ENSTGUT00000009158	CYP1B1	GO:0005739	cellular_component	mitochondrion
stratum 5a	3	35935094	ENSTGUG00000008796	ENSTGUT00000009158	CYP1B1	GO:0043065	biological_process	positive regulation of apoptotic process
stratum 5a	3	35935094	ENSTGUG00000008796	ENSTGUT00000009158	CYP1B1	GO:0009636	biological_process	response to toxic substance
stratum 5a	3	35935094	ENSTGUG00000008796	ENSTGUT00000009158	CYP1B1	GO:0042572	biological_process	retinol metabolic process
stratum 5a	3	35935094	ENSTGUG00000008796	ENSTGUT00000009158	CYP1B1	GO:0020037	molecular_function	heme binding
stratum 5a	3	35935094	ENSTGUG00000008796	ENSTGUT00000009158	CYP1B1	GO:0005506	molecular_function	iron ion binding
stratum 5a	3	35935094	ENSTGUG00000008796	ENSTGUT00000009158	CYP1B1	GO:0071603	biological_process	endothelial cell-cell adhesion
stratum 5a	3	35935094	ENSTGUG00000008796	ENSTGUT00000009158	CYP1B1	GO:0004497	molecular_function	monooxygenase activity
stratum 5a	3	35935094	ENSTGUG00000008796	ENSTGUT00000009158	CYP1B1	GO:0006725	biological_process	cellular aromatic compound metabolic process
stratum 5a	3	35935094	ENSTGUG00000008796	ENSTGUT00000009158	CYP1B1	GO:0016712	molecular_function	oxidoreductase activity, acting on paired donors, with incorporation or reduction of molecular oxygen, reduced flavin or flavoprotein as one donor, and incorporation of one atom of oxygen
stratum 5a	3	35935094	ENSTGUG00000008796	ENSTGUT00000009158	CYP1B1	GO:0016491	molecular_function	oxidoreductase activity
stratum 5a	3	35935094	ENSTGUG00000008796	ENSTGUT00000009158	CYP1B1	GO:0016705	molecular_function	oxidoreductase activity, acting on paired donors, with incorporation or reduction of molecular oxygen
stratum 5a	3	35935094	ENSTGUG00000008796	ENSTGUT00000009158	CYP1B1	GO:0061304	biological_process	retinal blood vessel morphogenesis
stratum 5a	3	35935094	ENSTGUG00000008796	ENSTGUT00000009158	CYP1B1	GO:0055114	biological_process	oxidation-reduction process
stratum 5a	3	37232627	ENSTGUG00000009273	ENSTGUT00000009727	MAP3K4	GO:0000165	biological_process	MAPK cascade
stratum 5a	3	37232627	ENSTGUG00000009273	ENSTGUT00000009727	MAP3K4	GO:0006468	biological_process	protein phosphorylation
stratum 5a	3	37232627	ENSTGUG00000009273	ENSTGUT00000009727	MAP3K4	GO:0004672	molecular_function	protein kinase activity
stratum 5a	3	37232627	ENSTGUG00000009273	ENSTGUT00000009727	MAP3K4	GO:0035556	biological_process	intracellular signal transduction
stratum 5a	3	37232627	ENSTGUG00000009273	ENSTGUT00000009727	MAP3K4	GO:0000186	biological_process	activation of MAPKK activity
stratum 5a	3	37232627	ENSTGUG00000009273	ENSTGUT00000009727	MAP3K4	GO:0010225	biological_process	response to UV-C
stratum 5a	3	37232627	ENSTGUG00000009273	ENSTGUT00000009727	MAP3K4	GO:0010468	biological_process	regulation of gene expression
stratum 5a	3	37232627	ENSTGUG00000009273	ENSTGUT00000009727	MAP3K4	GO:0005524	molecular_function	ATP binding
stratum 5a	3	37232627	ENSTGUG00000009273	ENSTGUT00000009727	MAP3K4	GO:0032212	biological_process	positive regulation of telomere maintenance via telomerase
stratum 5a	3	37232627	ENSTGUG00000009273	ENSTGUT00000009727	MAP3K4	GO:0043507	biological_process	positive regulation of JUN kinase activity
stratum 5a	3	37232627	ENSTGUG00000009273	ENSTGUT00000009727	MAP3K4	GO:0019100	biological_process	male germ-line sex determination
stratum 5a	3	37232627	ENSTGUG00000009273	ENSTGUT00000009727	MAP3K4	GO:0060718	biological_process	chorionic trophoblast cell differentiation
stratum 5a	3	37232627	ENSTGUG00000009273	ENSTGUT00000009727	MAP3K4	GO:0051973	biological_process	positive regulation of telomerase activity
stratum 5a	3	37232627	ENSTGUG00000009273	ENSTGUT00000009727	MAP3K4	GO:0004709	molecular_function	MAP kinase kinase kinase activity
stratum 5a	3	37232627	ENSTGUG00000009273	ENSTGUT00000009727	MAP3K4	GO:0005737	cellular_component	cytoplasm
stratum 5a	3	37232627	ENSTGUG00000009273	ENSTGUT00000009727	MAP3K4	GO:1900745	biological_process	positive regulation of p38MAPK cascade
stratum 5a	3	37232627	ENSTGUG00000009273	ENSTGUT00000009727	MAP3K4	GO:1904355	biological_process	positive regulation of telomere capping
stratum 5a	3	38103323	ENSTGUG00000009376	ENSTGUT00000009769	PACRG	GO:0044297	cellular_component	cell body
stratum 5a	3	38103323	ENSTGUG00000009376	ENSTGUT00000009769	PACRG	GO:0031982	cellular_component	vesicle
stratum 5a	3	38103323	ENSTGUG00000009376	ENSTGUT00000009769	PACRG	GO:0005829	cellular_component	cytosol
stratum 5a	3	38103323	ENSTGUG00000009376	ENSTGUT00000009769	PACRG	GO:0051879	molecular_function	Hsp90 protein binding
stratum 5a	3	38103323	ENSTGUG00000009376	ENSTGUT00000009769	PACRG	GO:0043014	molecular_function	alpha-tubulin binding
stratum 5a	3	38103323	ENSTGUG00000009376	ENSTGUT00000009769	PACRG	GO:0060548	biological_process	negative regulation of cell death
stratum 5a	3	38103323	ENSTGUG00000009376	ENSTGUT00000009769	PACRG	GO:0043005	cellular_component	neuron projection
stratum 5a	3	38103323	ENSTGUG00000009376	ENSTGUT00000009769	PACRG	GO:0003779	molecular_function	actin binding
stratum 5a	3	38103323	ENSTGUG00000009376	ENSTGUT00000009769	PACRG	GO:0001664	molecular_function	G-protein coupled receptor binding
stratum 5a	3	38103323	ENSTGUG00000009376	ENSTGUT00000009769	PACRG	GO:0031625	molecular_function	ubiquitin protein ligase binding
stratum 5a	3	38103323	ENSTGUG00000009376	ENSTGUT00000009769	PACRG	GO:0097225	cellular_component	sperm midpiece
stratum 5a	3	38103323	ENSTGUG00000009376	ENSTGUT00000009769	PACRG	GO:0051087	molecular_function	chaperone binding
stratum 5a	3	38103323	ENSTGUG00000009376	ENSTGUT00000009769	PACRG	GO:0048487	molecular_function	beta-tubulin binding
stratum 5a	3	38103323	ENSTGUG00000009376	ENSTGUT00000009769	PACRG	GO:0031072	molecular_function	heat shock protein binding
stratum 5a	3	38103323	ENSTGUG00000009376	ENSTGUT00000009769	PACRG	GO:0005929	cellular_component	cilium
stratum 5a	3	38103323	ENSTGUG00000009376	ENSTGUT00000009769	PACRG	GO:0030544	molecular_function	Hsp70 protein binding
stratum 5a	3	38103323	ENSTGUG00000009376	ENSTGUT00000009769	PACRG	GO:0007286	biological_process	spermatid development
stratum 5a	3	38356002	ENSTGUG00000009383	ENSTGUT00000009774	QKI	GO:0007286	biological_process	spermatid development
stratum 5a	3	38356002	ENSTGUG00000009383	ENSTGUT00000009774	QKI	GO:0010628	biological_process	positive regulation of gene expression
stratum 5a	3	38356002	ENSTGUG00000009383	ENSTGUT00000009774	QKI	GO:0042552	biological_process	myelination
stratum 5a	3	38356002	ENSTGUG00000009383	ENSTGUT00000009774	QKI	GO:0005634	cellular_component	nucleus
stratum 5a	3	38356002	ENSTGUG00000009383	ENSTGUT00000009774	QKI	GO:0042759	biological_process	long-chain fatty acid biosynthetic process
stratum 5a	3	38356002	ENSTGUG00000009383	ENSTGUT00000009774	QKI	GO:0008366	biological_process	axon ensheathment
stratum 5a	3	38356002	ENSTGUG00000009383	ENSTGUT00000009774	QKI	GO:0061158	biological_process	3'-UTR-mediated mRNA destabilization
stratum 5a	3	38356002	ENSTGUG00000009383	ENSTGUT00000009774	QKI	GO:0001570	biological_process	vasculogenesis
stratum 5a	3	38356002	ENSTGUG00000009383	ENSTGUT00000009774	QKI	GO:0042692	biological_process	muscle cell differentiation
stratum 5a	3	38356002	ENSTGUG00000009383	ENSTGUT00000009774	QKI	GO:0003729	molecular_function	mRNA binding
stratum 5a	3	38356002	ENSTGUG00000009383	ENSTGUT00000009774	QKI	GO:0003676	molecular_function	nucleic acid binding
stratum 5a	3	38356002	ENSTGUG00000009383	ENSTGUT00000009774	QKI	GO:0005737	cellular_component	cytoplasm
stratum 5a	3	38356002	ENSTGUG00000009383	ENSTGUT00000009774	QKI	GO:0003723	molecular_function	RNA binding
stratum 5a	3	40215769	ENSTGUG00000009563	ENSTGUT00000009958	CCR6	GO:0009986	cellular_component	cell surface
stratum 5a	3	40215769	ENSTGUG00000009563	ENSTGUT00000009958	CCR6	GO:0060474	biological_process	positive regulation of flagellated sperm motility involved in capacitation
stratum 5a	3	40215769	ENSTGUG00000009563	ENSTGUT00000009958	CCR6	GO:0060326	biological_process	cell chemotaxis
stratum 5a	3	40215769	ENSTGUG00000009563	ENSTGUT00000009958	CCR6	GO:0097225	cellular_component	sperm midpiece
stratum 5a	3	40215769	ENSTGUG00000009563	ENSTGUT00000009958	CCR6	GO:1904155	biological_process	DN2 thymocyte differentiation
stratum 5a	3	40215769	ENSTGUG00000009563	ENSTGUT00000009958	CCR6	GO:0004930	molecular_function	G-protein coupled receptor activity
stratum 5a	3	40215769	ENSTGUG00000009563	ENSTGUT00000009958	CCR6	GO:0070098	biological_process	chemokine-mediated signaling pathway
stratum 5a	3	40215769	ENSTGUG00000009563	ENSTGUT00000009958	CCR6	GO:0019722	biological_process	calcium-mediated signaling
stratum 5a	3	40215769	ENSTGUG00000009563	ENSTGUT00000009958	CCR6	GO:0036126	cellular_component	sperm flagellum
stratum 5a	3	40215769	ENSTGUG00000009563	ENSTGUT00000009958	CCR6	GO:0016020	cellular_component	membrane
stratum 5a	3	40215769	ENSTGUG00000009563	ENSTGUT00000009958	CCR6	GO:0007165	biological_process	signal transduction
stratum 5a	3	40215769	ENSTGUG00000009563	ENSTGUT00000009958	CCR6	GO:0004950	molecular_function	chemokine receptor activity
stratum 5a	3	40215769	ENSTGUG00000009563	ENSTGUT00000009958	CCR6	GO:0016493	molecular_function	C-C chemokine receptor activity
stratum 5a	3	40215769	ENSTGUG00000009563	ENSTGUT00000009958	CCR6	GO:0072679	biological_process	thymocyte migration
stratum 5a	3	40215769	ENSTGUG00000009563	ENSTGUT00000009958	CCR6	GO:0048290	biological_process	isotype switching to IgA isotypes
stratum 5a	3	40215769	ENSTGUG00000009563	ENSTGUT00000009958	CCR6	GO:0097228	cellular_component	sperm principal piece
stratum 5a	3	40215769	ENSTGUG00000009563	ENSTGUT00000009958	CCR6	GO:0002523	biological_process	leukocyte migration involved in inflammatory response
stratum 5a	3	40215769	ENSTGUG00000009563	ENSTGUT00000009958	CCR6	GO:0009897	cellular_component	external side of plasma membrane
stratum 5a	3	40215769	ENSTGUG00000009563	ENSTGUT00000009958	CCR6	GO:0007186	biological_process	G-protein coupled receptor signaling pathway
stratum 5a	3	40215769	ENSTGUG00000009563	ENSTGUT00000009958	CCR6	GO:0072676	biological_process	lymphocyte migration
stratum 5a	3	40215769	ENSTGUG00000009563	ENSTGUT00000009958	CCR6	GO:0006935	biological_process	chemotaxis
stratum 5a	3	40215769	ENSTGUG00000009563	ENSTGUT00000009958	CCR6	GO:2000404	biological_process	regulation of T cell migration
stratum 5a	3	40215769	ENSTGUG00000009563	ENSTGUT00000009958	CCR6	GO:0019957	molecular_function	C-C chemokine binding
stratum 5a	3	40215769	ENSTGUG00000009563	ENSTGUT00000009958	CCR6	GO:0006955	biological_process	immune response
stratum 5a	3	40215769	ENSTGUG00000009563	ENSTGUT00000009958	CCR6	GO:0016021	cellular_component	integral component of membrane
stratum 5a	3	40215769	ENSTGUG00000009563	ENSTGUT00000009958	CCR6	GO:1904156	biological_process	DN3 thymocyte differentiation
stratum 5a	3	40215769	ENSTGUG00000009563	ENSTGUT00000009958	CCR6	GO:0097524	cellular_component	sperm plasma membrane
stratum 5a	3	40215769	ENSTGUG00000009563	ENSTGUT00000009958	CCR6	GO:0005622	cellular_component	intracellular
stratum 5a	3	40215769	ENSTGUG00000009563	ENSTGUT00000009958	CCR6	GO:0072678	biological_process	T cell migration
stratum 5a	3	44707898	ENSTGUG00000010246	ENSTGUT00000010692	ARID4B	GO:0005634	cellular_component	nucleus
stratum 5a	3	44707898	ENSTGUG00000010246	ENSTGUT00000010692	ARID4B	GO:0006349	biological_process	regulation of gene expression by genetic imprinting
stratum 5a	3	44707898	ENSTGUG00000010246	ENSTGUT00000010692	ARID4B	GO:0007283	biological_process	spermatogenesis
stratum 5a	3	44707898	ENSTGUG00000010246	ENSTGUT00000010692	ARID4B	GO:0036124	biological_process	histone H3-K9 trimethylation
stratum 5a	3	44707898	ENSTGUG00000010246	ENSTGUT00000010692	ARID4B	GO:0034773	biological_process	histone H4-K20 trimethylation
stratum 5a	3	44707898	ENSTGUG00000010246	ENSTGUT00000010692	ARID4B	GO:0006355	biological_process	regulation of transcription, DNA-templated
stratum 5a	3	44707898	ENSTGUG00000010246	ENSTGUT00000010692	ARID4B	GO:0003677	molecular_function	DNA binding
stratum 5a	3	44707898	ENSTGUG00000010246	ENSTGUT00000010692	ARID4B	GO:0097368	biological_process	establishment of Sertoli cell barrier
stratum 5a	3	44707898	ENSTGUG00000010246	ENSTGUT00000010692	ARID4B	GO:0045944	biological_process	positive regulation of transcription by RNA polymerase II
stratum 5b	5	21376054	ENSTGUG00000010377	ENSTGUT00000010827	CELF1	GO:0005654	cellular_component	nucleoplasm
stratum 5b	5	21376054	ENSTGUG00000010377	ENSTGUT00000010827	CELF1	GO:0005737	cellular_component	cytoplasm
stratum 5b	5	21376054	ENSTGUG00000010377	ENSTGUT00000010827	CELF1	GO:0031369	molecular_function	translation initiation factor binding
stratum 5b	5	21376054	ENSTGUG00000010377	ENSTGUT00000010827	CELF1	GO:0003676	molecular_function	nucleic acid binding
stratum 5b	5	21376054	ENSTGUG00000010377	ENSTGUT00000010827	CELF1	GO:0005634	cellular_component	nucleus
stratum 5b	5	21376054	ENSTGUG00000010377	ENSTGUT00000010827	CELF1	GO:0003723	molecular_function	RNA binding
stratum 5b	5	21376054	ENSTGUG00000010377	ENSTGUT00000010827	CELF1	GO:0040018	biological_process	positive regulation of multicellular organism growth
stratum 5b	5	21376054	ENSTGUG00000010377	ENSTGUT00000010827	CELF1	GO:0007286	biological_process	spermatid development
stratum 5b	5	21376054	ENSTGUG00000010377	ENSTGUT00000010827	CELF1	GO:0006376	biological_process	mRNA splice site selection
stratum 5b	5	23837382	ENSTGUG00000010896	ENSTGUT00000011373	TYRO3	GO:0007218	biological_process	neuropeptide signaling pathway
stratum 5b	5	23837382	ENSTGUG00000010896	ENSTGUT00000011373	TYRO3	GO:0018108	biological_process	peptidyl-tyrosine phosphorylation
stratum 5b	5	23837382	ENSTGUG00000010896	ENSTGUT00000011373	TYRO3	GO:0060068	biological_process	vagina development
stratum 5b	5	23837382	ENSTGUG00000010896	ENSTGUT00000011373	TYRO3	GO:0070050	biological_process	neuron cellular homeostasis
stratum 5b	5	23837382	ENSTGUG00000010896	ENSTGUT00000011373	TYRO3	GO:0046777	biological_process	protein autophosphorylation
stratum 5b	5	23837382	ENSTGUG00000010896	ENSTGUT00000011373	TYRO3	GO:0046982	molecular_function	protein heterodimerization activity
stratum 5b	5	23837382	ENSTGUG00000010896	ENSTGUT00000011373	TYRO3	GO:0004672	molecular_function	protein kinase activity
stratum 5b	5	23837382	ENSTGUG00000010896	ENSTGUT00000011373	TYRO3	GO:0051250	biological_process	negative regulation of lymphocyte activation
stratum 5b	5	23837382	ENSTGUG00000010896	ENSTGUT00000011373	TYRO3	GO:0021885	biological_process	forebrain cell migration
stratum 5b	5	23837382	ENSTGUG00000010896	ENSTGUT00000011373	TYRO3	GO:0001779	biological_process	natural killer cell differentiation
stratum 5b	5	23837382	ENSTGUG00000010896	ENSTGUT00000011373	TYRO3	GO:0004713	molecular_function	protein tyrosine kinase activity
stratum 5b	5	23837382	ENSTGUG00000010896	ENSTGUT00000011373	TYRO3	GO:0005622	cellular_component	intracellular
stratum 5b	5	23837382	ENSTGUG00000010896	ENSTGUT00000011373	TYRO3	GO:0006468	biological_process	protein phosphorylation
stratum 5b	5	23837382	ENSTGUG00000010896	ENSTGUT00000011373	TYRO3	GO:0000166	molecular_function	nucleotide binding
stratum 5b	5	23837382	ENSTGUG00000010896	ENSTGUT00000011373	TYRO3	GO:0009986	cellular_component	cell surface
stratum 5b	5	23837382	ENSTGUG00000010896	ENSTGUT00000011373	TYRO3	GO:0050728	biological_process	negative regulation of inflammatory response
stratum 5b	5	23837382	ENSTGUG00000010896	ENSTGUT00000011373	TYRO3	GO:0045824	biological_process	negative regulation of innate immune response
stratum 5b	5	23837382	ENSTGUG00000010896	ENSTGUT00000011373	TYRO3	GO:0043524	biological_process	negative regulation of neuron apoptotic process
stratum 5b	5	23837382	ENSTGUG00000010896	ENSTGUT00000011373	TYRO3	GO:0070527	biological_process	platelet aggregation
stratum 5b	5	23837382	ENSTGUG00000010896	ENSTGUT00000011373	TYRO3	GO:0016020	cellular_component	membrane
stratum 5b	5	23837382	ENSTGUG00000010896	ENSTGUT00000011373	TYRO3	GO:0007283	biological_process	spermatogenesis
stratum 5b	5	23837382	ENSTGUG00000010896	ENSTGUT00000011373	TYRO3	GO:0005524	molecular_function	ATP binding
stratum 5b	5	23837382	ENSTGUG00000010896	ENSTGUT00000011373	TYRO3	GO:0016021	cellular_component	integral component of membrane
stratum 5b	5	23837382	ENSTGUG00000010896	ENSTGUT00000011373	TYRO3	GO:0043548	molecular_function	phosphatidylinositol 3-kinase binding
stratum 5b	5	23837382	ENSTGUG00000010896	ENSTGUT00000011373	TYRO3	GO:0016301	molecular_function	kinase activity
stratum 5b	5	23837382	ENSTGUG00000010896	ENSTGUT00000011373	TYRO3	GO:0043491	biological_process	protein kinase B signaling
stratum 5b	5	23837382	ENSTGUG00000010896	ENSTGUT00000011373	TYRO3	GO:0016310	biological_process	phosphorylation
stratum 5b	5	23837382	ENSTGUG00000010896	ENSTGUT00000011373	TYRO3	GO:0030168	biological_process	platelet activation
stratum 5b	5	23837382	ENSTGUG00000010896	ENSTGUT00000011373	TYRO3	GO:0043277	biological_process	apoptotic cell clearance
stratum 5b	5	23837382	ENSTGUG00000010896	ENSTGUT00000011373	TYRO3	GO:0034122	biological_process	negative regulation of toll-like receptor signaling pathway
stratum 5b	5	23837382	ENSTGUG00000010896	ENSTGUT00000011373	TYRO3	GO:0016740	molecular_function	transferase activity
stratum 5b	5	23837382	ENSTGUG00000010896	ENSTGUT00000011373	TYRO3	GO:0032940	biological_process	secretion by cell
stratum 5b	5	23837382	ENSTGUG00000010896	ENSTGUT00000011373	TYRO3	GO:0042698	biological_process	ovulation cycle
stratum 5b	5	23837382	ENSTGUG00000010896	ENSTGUT00000011373	TYRO3	GO:0034446	biological_process	substrate adhesion-dependent cell spreading
stratum 5a	3	51255019	ENSTGUG00000010941	ENSTGUT00000011397	CITED2	GO:0061308	biological_process	cardiac neural crest cell development involved in heart development
stratum 5a	3	51255019	ENSTGUG00000010941	ENSTGUT00000011397	CITED2	GO:0002244	biological_process	hematopoietic progenitor cell differentiation
stratum 5a	3	51255019	ENSTGUG00000010941	ENSTGUT00000011397	CITED2	GO:0001843	biological_process	neural tube closure
stratum 5a	3	51255019	ENSTGUG00000010941	ENSTGUT00000011397	CITED2	GO:0046332	molecular_function	SMAD binding
stratum 5a	3	51255019	ENSTGUG00000010941	ENSTGUT00000011397	CITED2	GO:0045787	biological_process	positive regulation of cell cycle
stratum 5a	3	51255019	ENSTGUG00000010941	ENSTGUT00000011397	CITED2	GO:0001944	biological_process	vasculature development
stratum 5a	3	51255019	ENSTGUG00000010941	ENSTGUT00000011397	CITED2	GO:0001568	biological_process	blood vessel development
stratum 5a	3	51255019	ENSTGUG00000010941	ENSTGUT00000011397	CITED2	GO:0000790	cellular_component	nuclear chromatin
stratum 5a	3	51255019	ENSTGUG00000010941	ENSTGUT00000011397	CITED2	GO:0001889	biological_process	liver development
stratum 5a	3	51255019	ENSTGUG00000010941	ENSTGUT00000011397	CITED2	GO:0061156	biological_process	pulmonary artery morphogenesis
stratum 5a	3	51255019	ENSTGUG00000010941	ENSTGUT00000011397	CITED2	GO:0035914	biological_process	skeletal muscle cell differentiation
stratum 5a	3	51255019	ENSTGUG00000010941	ENSTGUT00000011397	CITED2	GO:0006357	biological_process	regulation of transcription by RNA polymerase II
stratum 5a	3	51255019	ENSTGUG00000010941	ENSTGUT00000011397	CITED2	GO:0043066	biological_process	negative regulation of apoptotic process
stratum 5a	3	51255019	ENSTGUG00000010941	ENSTGUT00000011397	CITED2	GO:0001841	biological_process	neural tube formation
stratum 5a	3	51255019	ENSTGUG00000010941	ENSTGUT00000011397	CITED2	GO:0035802	biological_process	adrenal cortex formation
stratum 5a	3	51255019	ENSTGUG00000010941	ENSTGUT00000011397	CITED2	GO:0002521	biological_process	leukocyte differentiation
stratum 5a	3	51255019	ENSTGUG00000010941	ENSTGUT00000011397	CITED2	GO:0003151	biological_process	outflow tract morphogenesis
stratum 5a	3	51255019	ENSTGUG00000010941	ENSTGUT00000011397	CITED2	GO:0007179	biological_process	transforming growth factor beta receptor signaling pathway
stratum 5a	3	51255019	ENSTGUG00000010941	ENSTGUT00000011397	CITED2	GO:0001947	biological_process	heart looping
stratum 5a	3	51255019	ENSTGUG00000010941	ENSTGUT00000011397	CITED2	GO:0060971	biological_process	embryonic heart tube left/right pattern formation
stratum 5a	3	51255019	ENSTGUG00000010941	ENSTGUT00000011397	CITED2	GO:2000020	biological_process	positive regulation of male gonad development
stratum 5a	3	51255019	ENSTGUG00000010941	ENSTGUT00000011397	CITED2	GO:1900164	biological_process	nodal signaling pathway involved in determination of lateral mesoderm left/right asymmetry
stratum 5a	3	51255019	ENSTGUG00000010941	ENSTGUT00000011397	CITED2	GO:0003156	biological_process	regulation of animal organ formation
stratum 5a	3	51255019	ENSTGUG00000010941	ENSTGUT00000011397	CITED2	GO:0030511	biological_process	positive regulation of transforming growth factor beta receptor signaling pathway
stratum 5a	3	51255019	ENSTGUG00000010941	ENSTGUT00000011397	CITED2	GO:0003281	biological_process	ventricular septum development
stratum 5a	3	51255019	ENSTGUG00000010941	ENSTGUT00000011397	CITED2	GO:0002089	biological_process	lens morphogenesis in camera-type eye
stratum 5a	3	51255019	ENSTGUG00000010941	ENSTGUT00000011397	CITED2	GO:0001570	biological_process	vasculogenesis
stratum 5a	3	51255019	ENSTGUG00000010941	ENSTGUT00000011397	CITED2	GO:0007368	biological_process	determination of left/right symmetry
stratum 5a	3	51255019	ENSTGUG00000010941	ENSTGUT00000011397	CITED2	GO:0048538	biological_process	thymus development
stratum 5a	3	51255019	ENSTGUG00000010941	ENSTGUT00000011397	CITED2	GO:0003682	molecular_function	chromatin binding
stratum 5a	3	51255019	ENSTGUG00000010941	ENSTGUT00000011397	CITED2	GO:0070986	biological_process	left/right axis specification
stratum 5a	3	51255019	ENSTGUG00000010941	ENSTGUT00000011397	CITED2	GO:0060411	biological_process	cardiac septum morphogenesis
stratum 5a	3	51255019	ENSTGUG00000010941	ENSTGUT00000011397	CITED2	GO:0003197	biological_process	endocardial cushion development
stratum 5a	3	51255019	ENSTGUG00000010941	ENSTGUT00000011397	CITED2	GO:0007417	biological_process	central nervous system development
stratum 5a	3	51255019	ENSTGUG00000010941	ENSTGUT00000011397	CITED2	GO:0048536	biological_process	spleen development
stratum 5a	3	51255019	ENSTGUG00000010941	ENSTGUT00000011397	CITED2	GO:0003713	molecular_function	transcription coactivator activity
stratum 5a	3	51255019	ENSTGUG00000010941	ENSTGUT00000011397	CITED2	GO:0030325	biological_process	adrenal gland development
stratum 5a	3	51255019	ENSTGUG00000010941	ENSTGUT00000011397	CITED2	GO:0060412	biological_process	ventricular septum morphogenesis
stratum 5a	3	51255019	ENSTGUG00000010941	ENSTGUT00000011397	CITED2	GO:0001102	molecular_function	RNA polymerase II activating transcription factor binding
stratum 5a	3	51255019	ENSTGUG00000010941	ENSTGUT00000011397	CITED2	GO:0045893	biological_process	positive regulation of transcription, DNA-templated
stratum 5a	3	51255019	ENSTGUG00000010941	ENSTGUT00000011397	CITED2	GO:0060349	biological_process	bone morphogenesis
stratum 5a	3	51255019	ENSTGUG00000010941	ENSTGUT00000011397	CITED2	GO:0048596	biological_process	embryonic camera-type eye morphogenesis
stratum 5a	3	51255019	ENSTGUG00000010941	ENSTGUT00000011397	CITED2	GO:0005634	cellular_component	nucleus
stratum 5a	3	51255019	ENSTGUG00000010941	ENSTGUT00000011397	CITED2	GO:0061371	biological_process	determination of heart left/right asymmetry
stratum 5a	3	51255019	ENSTGUG00000010941	ENSTGUT00000011397	CITED2	GO:0003700	molecular_function	DNA binding transcription factor activity
stratum 5a	3	51255019	ENSTGUG00000010941	ENSTGUT00000011397	CITED2	GO:0030851	biological_process	granulocyte differentiation
stratum 5a	3	51255019	ENSTGUG00000010941	ENSTGUT00000011397	CITED2	GO:0007530	biological_process	sex determination
stratum 5a	3	51255019	ENSTGUG00000010941	ENSTGUT00000011397	CITED2	GO:0007422	biological_process	peripheral nervous system development
stratum 5a	3	51255019	ENSTGUG00000010941	ENSTGUT00000011397	CITED2	GO:0007507	biological_process	heart development
stratum 5a	3	51255019	ENSTGUG00000010941	ENSTGUT00000011397	CITED2	GO:0022409	biological_process	positive regulation of cell-cell adhesion
stratum 5a	3	51255019	ENSTGUG00000010941	ENSTGUT00000011397	CITED2	GO:0006355	biological_process	regulation of transcription, DNA-templated
stratum 5a	3	51255019	ENSTGUG00000010941	ENSTGUT00000011397	CITED2	GO:0021602	biological_process	cranial nerve morphogenesis
stratum 5a	3	51255019	ENSTGUG00000010941	ENSTGUT00000011397	CITED2	GO:0048821	biological_process	erythrocyte development
stratum 5a	3	51255019	ENSTGUG00000010941	ENSTGUT00000011397	CITED2	GO:0008584	biological_process	male gonad development
stratum 5a	3	51255019	ENSTGUG00000010941	ENSTGUT00000011397	CITED2	GO:0045944	biological_process	positive regulation of transcription by RNA polymerase II
stratum 5a	3	56300104	ENSTGUG00000011249	ENSTGUT00000011730	ESR1	GO:0046872	molecular_function	metal ion binding
stratum 5a	3	56300104	ENSTGUG00000011249	ENSTGUT00000011730	ESR1	GO:0043401	biological_process	steroid hormone mediated signaling pathway
stratum 5a	3	56300104	ENSTGUG00000011249	ENSTGUT00000011730	ESR1	GO:0034056	molecular_function	estrogen response element binding
stratum 5a	3	56300104	ENSTGUG00000011249	ENSTGUT00000011730	ESR1	GO:0005634	cellular_component	nucleus
stratum 5a	3	56300104	ENSTGUG00000011249	ENSTGUT00000011730	ESR1	GO:0003677	molecular_function	DNA binding
stratum 5a	3	56300104	ENSTGUG00000011249	ENSTGUT00000011730	ESR1	GO:0030331	molecular_function	estrogen receptor binding
stratum 5a	3	56300104	ENSTGUG00000011249	ENSTGUT00000011730	ESR1	GO:0035327	cellular_component	transcriptionally active chromatin
stratum 5a	3	56300104	ENSTGUG00000011249	ENSTGUT00000011730	ESR1	GO:0043124	biological_process	negative regulation of I-kappaB kinase/NF-kappaB signaling
stratum 5a	3	56300104	ENSTGUG00000011249	ENSTGUT00000011730	ESR1	GO:0034121	biological_process	regulation of toll-like receptor signaling pathway
stratum 5a	3	56300104	ENSTGUG00000011249	ENSTGUT00000011730	ESR1	GO:0006351	biological_process	transcription, DNA-templated
stratum 5a	3	56300104	ENSTGUG00000011249	ENSTGUT00000011730	ESR1	GO:0000790	cellular_component	nuclear chromatin
stratum 5a	3	56300104	ENSTGUG00000011249	ENSTGUT00000011730	ESR1	GO:0032991	cellular_component	protein-containing complex
stratum 5a	3	56300104	ENSTGUG00000011249	ENSTGUT00000011730	ESR1	GO:0042981	biological_process	regulation of apoptotic process
stratum 5a	3	56300104	ENSTGUG00000011249	ENSTGUT00000011730	ESR1	GO:0030284	molecular_function	estrogen receptor activity
stratum 5a	3	56300104	ENSTGUG00000011249	ENSTGUT00000011730	ESR1	GO:0043627	biological_process	response to estrogen
stratum 5a	3	56300104	ENSTGUG00000011249	ENSTGUT00000011730	ESR1	GO:0006355	biological_process	regulation of transcription, DNA-templated
stratum 5a	3	56300104	ENSTGUG00000011249	ENSTGUT00000011730	ESR1	GO:0005886	cellular_component	plasma membrane
stratum 5a	3	56300104	ENSTGUG00000011249	ENSTGUT00000011730	ESR1	GO:0019901	molecular_function	protein kinase binding
stratum 5a	3	56300104	ENSTGUG00000011249	ENSTGUT00000011730	ESR1	GO:0010629	biological_process	negative regulation of gene expression
stratum 5a	3	56300104	ENSTGUG00000011249	ENSTGUT00000011730	ESR1	GO:0030284	molecular_function	estrogen receptor activity
stratum 5a	3	56300104	ENSTGUG00000011249	ENSTGUT00000011730	ESR1	GO:0032355	biological_process	response to estradiol
stratum 5a	3	56300104	ENSTGUG00000011249	ENSTGUT00000011730	ESR1	GO:0038052	molecular_function	RNA polymerase II transcription factor activity, estrogen-activated sequence-specific DNA binding
stratum 5a	3	56300104	ENSTGUG00000011249	ENSTGUT00000011730	ESR1	GO:0048146	biological_process	positive regulation of fibroblast proliferation
stratum 5a	3	56300104	ENSTGUG00000011249	ENSTGUT00000011730	ESR1	GO:0003707	molecular_function	steroid hormone receptor activity
stratum 5a	3	56300104	ENSTGUG00000011249	ENSTGUT00000011730	ESR1	GO:0005737	cellular_component	cytoplasm
stratum 5a	3	56300104	ENSTGUG00000011249	ENSTGUT00000011730	ESR1	GO:0019899	molecular_function	enzyme binding
stratum 5a	3	56300104	ENSTGUG00000011249	ENSTGUT00000011730	ESR1	GO:0050727	biological_process	regulation of inflammatory response
stratum 5a	3	56300104	ENSTGUG00000011249	ENSTGUT00000011730	ESR1	GO:0043433	biological_process	negative regulation of DNA binding transcription factor activity
stratum 5a	3	56300104	ENSTGUG00000011249	ENSTGUT00000011730	ESR1	GO:0042802	molecular_function	identical protein binding
stratum 5a	3	56300104	ENSTGUG00000011249	ENSTGUT00000011730	ESR1	GO:0048863	biological_process	stem cell differentiation
stratum 5a	3	56300104	ENSTGUG00000011249	ENSTGUT00000011730	ESR1	GO:0003700	molecular_function	DNA binding transcription factor activity
stratum 5a	3	56300104	ENSTGUG00000011249	ENSTGUT00000011730	ESR1	GO:0008584	biological_process	male gonad development
stratum 5a	3	56300104	ENSTGUG00000011249	ENSTGUT00000011730	ESR1	GO:0045899	biological_process	positive regulation of RNA polymerase II transcriptional preinitiation complex assembly
stratum 5a	3	56300104	ENSTGUG00000011249	ENSTGUT00000011730	ESR1	GO:0030520	biological_process	intracellular estrogen receptor signaling pathway
stratum 5a	3	56300104	ENSTGUG00000011249	ENSTGUT00000011730	ESR1	GO:0071392	biological_process	cellular response to estradiol stimulus
stratum 5a	3	56300104	ENSTGUG00000011249	ENSTGUT00000011730	ESR1	GO:1903799	biological_process	negative regulation of production of miRNAs involved in gene silencing by miRNA
stratum 5a	3	56300104	ENSTGUG00000011249	ENSTGUT00000011730	ESR1	GO:0071391	biological_process	cellular response to estrogen stimulus
stratum 5a	3	56300104	ENSTGUG00000011249	ENSTGUT00000011730	ESR1	GO:0048747	biological_process	muscle fiber development
stratum 5a	3	56300104	ENSTGUG00000011249	ENSTGUT00000011730	ESR1	GO:0008270	molecular_function	zinc ion binding
stratum 5a	3	56300104	ENSTGUG00000011249	ENSTGUT00000011730	ESR1	GO:0005496	molecular_function	steroid binding
stratum 5a	3	56300104	ENSTGUG00000011249	ENSTGUT00000011730	ESR1	GO:0051091	biological_process	positive regulation of DNA binding transcription factor activity
stratum 5a	3	56300104	ENSTGUG00000011249	ENSTGUT00000011730	ESR1	GO:0060065	biological_process	uterus development
stratum 5a	3	56300104	ENSTGUG00000011249	ENSTGUT00000011730	ESR1	GO:0017025	molecular_function	TBP-class protein binding
stratum 5a	3	56300104	ENSTGUG00000011249	ENSTGUT00000011730	ESR1	GO:0001547	biological_process	antral ovarian follicle growth
stratum 5a	3	56300104	ENSTGUG00000011249	ENSTGUT00000011730	ESR1	GO:0045893	biological_process	positive regulation of transcription, DNA-templated
stratum 5a	3	56300104	ENSTGUG00000011249	ENSTGUT00000011730	ESR1	GO:0006366	biological_process	transcription by RNA polymerase II
stratum 5a	3	56300104	ENSTGUG00000011249	ENSTGUT00000011730	ESR1	GO:0045944	biological_process	positive regulation of transcription by RNA polymerase II
stratum 5a	3	56300104	ENSTGUG00000011249	ENSTGUT00000011730	ESR1	GO:0008013	molecular_function	beta-catenin binding
stratum 5a	3	56300104	ENSTGUG00000011249	ENSTGUT00000011730	ESR1	GO:0043565	molecular_function	sequence-specific DNA binding
stratum 5a	3	56300104	ENSTGUG00000011249	ENSTGUT00000011730	ESR1	GO:0004879	molecular_function	nuclear receptor activity
stratum 5a	3	56300104	ENSTGUG00000011249	ENSTGUT00000011730	ESR1	GO:0010628	biological_process	positive regulation of gene expression
stratum 5a	3	56300104	ENSTGUG00000011249	ENSTGUT00000011730	ESR1	GO:0060068	biological_process	vagina development
stratum 5a	3	56300104	ENSTGUG00000011249	ENSTGUT00000011730	ESR1	GO:0051117	molecular_function	ATPase binding
stratum 5a	3	56300104	ENSTGUG00000011249	ENSTGUT00000011730	ESR1	GO:0005634	cellular_component	nucleus
stratum 5a	3	56300104	ENSTGUG00000011249	ENSTGUT00000011730	ESR1	GO:0060523	biological_process	prostate epithelial cord elongation
stratum 5a	3	56300104	ENSTGUG00000011249	ENSTGUT00000011730	ESR1	GO:0002064	biological_process	epithelial cell development
stratum 5a	3	56300104	ENSTGUG00000011249	ENSTGUT00000011730	ESR1	GO:0060687	biological_process	regulation of branching involved in prostate gland morphogenesis
stratum 5a	3	56300104	ENSTGUG00000011249	ENSTGUT00000011730	ESR1	GO:0008209	biological_process	androgen metabolic process
stratum 5a	3	56300104	ENSTGUG00000011249	ENSTGUT00000011730	ESR1	GO:0000122	biological_process	negative regulation of transcription by RNA polymerase II
stratum 5a	3	56300104	ENSTGUG00000011249	ENSTGUT00000011730	ESR1	GO:0001077	molecular_function	transcriptional activator activity, RNA polymerase II proximal promoter sequence-specific DNA binding
stratum 5a	3	56300104	ENSTGUG00000011249	ENSTGUT00000011730	ESR1	GO:0097550	cellular_component	transcriptional preinitiation complex
stratum 5a	3	56300104	ENSTGUG00000011249	ENSTGUT00000011730	ESR1	GO:0008134	molecular_function	transcription factor binding
stratum 5a	3	56300104	ENSTGUG00000011249	ENSTGUT00000011730	ESR1	GO:0071168	biological_process	protein localization to chromatin
stratum 5a	3	56300104	ENSTGUG00000011249	ENSTGUT00000011730	ESR1	GO:0003682	molecular_function	chromatin binding
stratum 5a	3	56300104	ENSTGUG00000011249	ENSTGUT00000011730	ESR1	GO:0060527	biological_process	prostate epithelial cord arborization involved in prostate glandular acinus morphogenesis
stratum 5a	3	56300104	ENSTGUG00000011249	ENSTGUT00000011730	ESR1	GO:0000978	molecular_function	RNA polymerase II proximal promoter sequence-specific DNA binding
stratum 5a	3	56300104	ENSTGUG00000011249	ENSTGUT00000011730	ESR1	GO:0001223	molecular_function	transcription coactivator binding
stratum 5a	3	56300104	ENSTGUG00000011249	ENSTGUT00000011730	ESR1	GO:0008289	molecular_function	lipid binding
stratum 5a	3	56300104	ENSTGUG00000011249	ENSTGUT00000011730	ESR1	GO:0001093	molecular_function	TFIIB-class transcription factor binding
stratum 5a	3	57241590	ENSTGUG00000011347	ENSTGUT00000011820	LATS1	GO:0090090	biological_process	negative regulation of canonical Wnt signaling pathway
stratum 5a	3	57241590	ENSTGUG00000011347	ENSTGUT00000011820	LATS1	GO:0019901	molecular_function	protein kinase binding
stratum 5a	3	57241590	ENSTGUG00000011347	ENSTGUT00000011820	LATS1	GO:0000922	cellular_component	spindle pole
stratum 5a	3	57241590	ENSTGUG00000011347	ENSTGUT00000011820	LATS1	GO:0005524	molecular_function	ATP binding
stratum 5a	3	57241590	ENSTGUG00000011347	ENSTGUT00000011820	LATS1	GO:0051220	biological_process	cytoplasmic sequestering of protein
stratum 5a	3	57241590	ENSTGUG00000011347	ENSTGUT00000011820	LATS1	GO:0043254	biological_process	regulation of protein complex assembly
stratum 5a	3	57241590	ENSTGUG00000011347	ENSTGUT00000011820	LATS1	GO:0030331	molecular_function	estrogen receptor binding
stratum 5a	3	57241590	ENSTGUG00000011347	ENSTGUT00000011820	LATS1	GO:0006468	biological_process	protein phosphorylation
stratum 5a	3	57241590	ENSTGUG00000011347	ENSTGUT00000011820	LATS1	GO:0004672	molecular_function	protein kinase activity
stratum 5a	3	57241590	ENSTGUG00000011347	ENSTGUT00000011820	LATS1	GO:0000278	biological_process	mitotic cell cycle
stratum 5a	3	57241590	ENSTGUG00000011347	ENSTGUT00000011820	LATS1	GO:0035329	biological_process	hippo signaling
stratum 5a	3	57241590	ENSTGUG00000011347	ENSTGUT00000011820	LATS1	GO:0030216	biological_process	keratinocyte differentiation
stratum 5a	3	57241590	ENSTGUG00000011347	ENSTGUT00000011820	LATS1	GO:2000058	biological_process	regulation of ubiquitin-dependent protein catabolic process
stratum 5a	3	57241590	ENSTGUG00000011347	ENSTGUT00000011820	LATS1	GO:0030833	biological_process	regulation of actin filament polymerization
stratum 5a	3	57241590	ENSTGUG00000011347	ENSTGUT00000011820	LATS1	GO:0045736	biological_process	negative regulation of cyclin-dependent protein serine/threonine kinase activity
stratum 5a	3	57241590	ENSTGUG00000011347	ENSTGUT00000011820	LATS1	GO:0033146	biological_process	regulation of intracellular estrogen receptor signaling pathway
stratum 5a	3	57241590	ENSTGUG00000011347	ENSTGUT00000011820	LATS1	GO:0034613	biological_process	cellular protein localization
stratum 5a	3	57241590	ENSTGUG00000011347	ENSTGUT00000011820	LATS1	GO:0004674	molecular_function	protein serine/threonine kinase activity
stratum 5a	3	57241590	ENSTGUG00000011347	ENSTGUT00000011820	LATS1	GO:0000819	biological_process	sister chromatid segregation
stratum 5a	3	57241590	ENSTGUG00000011347	ENSTGUT00000011820	LATS1	GO:0009755	biological_process	hormone-mediated signaling pathway
stratum 5a	3	57241590	ENSTGUG00000011347	ENSTGUT00000011820	LATS1	GO:0000086	biological_process	G2/M transition of mitotic cell cycle
stratum 5a	3	57241590	ENSTGUG00000011347	ENSTGUT00000011820	LATS1	GO:0000287	molecular_function	magnesium ion binding
stratum 5a	3	57241590	ENSTGUG00000011347	ENSTGUT00000011820	LATS1	GO:0033138	biological_process	positive regulation of peptidyl-serine phosphorylation
stratum 5a	3	58492573	ENSTGUG00000011544	ENSTGUT00000012029	TBPL1	GO:0005737	cellular_component	cytoplasm
stratum 5a	3	58492573	ENSTGUG00000011544	ENSTGUT00000012029	TBPL1	GO:0005634	cellular_component	nucleus
stratum 5a	3	58492573	ENSTGUG00000011544	ENSTGUT00000012029	TBPL1	GO:0007289	biological_process	spermatid nucleus differentiation
stratum 5a	3	58492573	ENSTGUG00000011544	ENSTGUT00000012029	TBPL1	GO:0006235	biological_process	dTTP biosynthetic process
stratum 5a	3	58492573	ENSTGUG00000011544	ENSTGUT00000012029	TBPL1	GO:0003677	molecular_function	DNA binding
stratum 5a	3	58492573	ENSTGUG00000011544	ENSTGUT00000012029	TBPL1	GO:0045944	biological_process	positive regulation of transcription by RNA polymerase II
stratum 5a	3	58492573	ENSTGUG00000011544	ENSTGUT00000012029	TBPL1	GO:0001077	molecular_function	transcriptional activator activity, RNA polymerase II proximal promoter sequence-specific DNA binding
stratum 5a	3	58492573	ENSTGUG00000011544	ENSTGUT00000012029	TBPL1	GO:0000978	molecular_function	RNA polymerase II proximal promoter sequence-specific DNA binding
stratum 5a	3	58492573	ENSTGUG00000011544	ENSTGUT00000012029	TBPL1	GO:0007283	biological_process	spermatogenesis
stratum 5a	3	58492573	ENSTGUG00000011544	ENSTGUT00000012029	TBPL1	GO:0006352	biological_process	DNA-templated transcription, initiation
stratum 5a	3	58492573	ENSTGUG00000011544	ENSTGUT00000012029	TBPL1	GO:0006366	biological_process	transcription by RNA polymerase II
stratum 5a	3	58492573	ENSTGUG00000011544	ENSTGUT00000012029	TBPL1	GO:0005672	cellular_component	transcription factor TFIIA complex
stratum 5a	3	58492573	ENSTGUG00000011544	ENSTGUT00000012029	TBPL1	GO:0001675	biological_process	acrosome assembly
stratum 5a	3	58516413	ENSTGUG00000011548	ENSTGUT00000012035	TCF21	GO:0060541	biological_process	respiratory system development
stratum 5a	3	58516413	ENSTGUG00000011548	ENSTGUT00000012035	TCF21	GO:0005634	cellular_component	nucleus
stratum 5a	3	58516413	ENSTGUG00000011548	ENSTGUT00000012035	TCF21	GO:0042826	molecular_function	histone deacetylase binding
stratum 5a	3	58516413	ENSTGUG00000011548	ENSTGUT00000012035	TCF21	GO:0007530	biological_process	sex determination
stratum 5a	3	58516413	ENSTGUG00000011548	ENSTGUT00000012035	TCF21	GO:0001657	biological_process	ureteric bud development
stratum 5a	3	58516413	ENSTGUG00000011548	ENSTGUT00000012035	TCF21	GO:0072277	biological_process	metanephric glomerular capillary formation
stratum 5a	3	58516413	ENSTGUG00000011548	ENSTGUT00000012035	TCF21	GO:0060435	biological_process	bronchiole development
stratum 5a	3	58516413	ENSTGUG00000011548	ENSTGUT00000012035	TCF21	GO:0072162	biological_process	metanephric mesenchymal cell differentiation
stratum 5a	3	58516413	ENSTGUG00000011548	ENSTGUT00000012035	TCF21	GO:0000122	biological_process	negative regulation of transcription by RNA polymerase II
stratum 5a	3	58516413	ENSTGUG00000011548	ENSTGUT00000012035	TCF21	GO:0050681	molecular_function	androgen receptor binding
stratum 5a	3	58516413	ENSTGUG00000011548	ENSTGUT00000012035	TCF21	GO:0014707	biological_process	branchiomeric skeletal muscle development
stratum 5a	3	58516413	ENSTGUG00000011548	ENSTGUT00000012035	TCF21	GO:0060425	biological_process	lung morphogenesis
stratum 5a	3	58516413	ENSTGUG00000011548	ENSTGUT00000012035	TCF21	GO:0060766	biological_process	negative regulation of androgen receptor signaling pathway
stratum 5a	3	58516413	ENSTGUG00000011548	ENSTGUT00000012035	TCF21	GO:0001763	biological_process	morphogenesis of a branching structure
stratum 5a	3	58516413	ENSTGUG00000011548	ENSTGUT00000012035	TCF21	GO:0070888	molecular_function	E-box binding
stratum 5a	3	58516413	ENSTGUG00000011548	ENSTGUT00000012035	TCF21	GO:0009887	biological_process	animal organ morphogenesis
stratum 5a	3	58516413	ENSTGUG00000011548	ENSTGUT00000012035	TCF21	GO:0001658	biological_process	branching involved in ureteric bud morphogenesis
stratum 5a	3	58516413	ENSTGUG00000011548	ENSTGUT00000012035	TCF21	GO:0043425	molecular_function	bHLH transcription factor binding
stratum 5a	3	58516413	ENSTGUG00000011548	ENSTGUT00000012035	TCF21	GO:0007548	biological_process	sex differentiation
stratum 5a	3	58516413	ENSTGUG00000011548	ENSTGUT00000012035	TCF21	GO:0060426	biological_process	lung vasculature development
stratum 5a	3	58516413	ENSTGUG00000011548	ENSTGUT00000012035	TCF21	GO:0060021	biological_process	roof of mouth development
stratum 5a	3	58516413	ENSTGUG00000011548	ENSTGUT00000012035	TCF21	GO:0006366	biological_process	transcription by RNA polymerase II
stratum 5a	3	58516413	ENSTGUG00000011548	ENSTGUT00000012035	TCF21	GO:0001078	molecular_function	transcriptional repressor activity, RNA polymerase II proximal promoter sequence-specific DNA binding
stratum 5a	3	58516413	ENSTGUG00000011548	ENSTGUT00000012035	TCF21	GO:0032835	biological_process	glomerulus development
stratum 5a	3	58516413	ENSTGUG00000011548	ENSTGUT00000012035	TCF21	GO:0045944	biological_process	positive regulation of transcription by RNA polymerase II
stratum 5a	3	58516413	ENSTGUG00000011548	ENSTGUT00000012035	TCF21	GO:0048608	biological_process	reproductive structure development
stratum 5a	3	58516413	ENSTGUG00000011548	ENSTGUT00000012035	TCF21	GO:0030855	biological_process	epithelial cell differentiation
stratum 5a	3	58516413	ENSTGUG00000011548	ENSTGUT00000012035	TCF21	GO:0001944	biological_process	vasculature development
stratum 5a	3	58516413	ENSTGUG00000011548	ENSTGUT00000012035	TCF21	GO:0048536	biological_process	spleen development
stratum 5a	3	58516413	ENSTGUG00000011548	ENSTGUT00000012035	TCF21	GO:0001077	molecular_function	transcriptional activator activity, RNA polymerase II proximal promoter sequence-specific DNA binding
stratum 5a	3	58516413	ENSTGUG00000011548	ENSTGUT00000012035	TCF21	GO:0046983	molecular_function	protein dimerization activity
stratum 5a	3	58516413	ENSTGUG00000011548	ENSTGUT00000012035	TCF21	GO:0048286	biological_process	lung alveolus development
stratum 5a	3	58516413	ENSTGUG00000011548	ENSTGUT00000012035	TCF21	GO:0001822	biological_process	kidney development
stratum 5a	3	63576345	ENSTGUG00000011838	ENSTGUT00000012338	HSF2	GO:0005737	cellular_component	cytoplasm
stratum 5a	3	63576345	ENSTGUG00000011838	ENSTGUT00000012338	HSF2	GO:0006366	biological_process	transcription by RNA polymerase II
stratum 5a	3	63576345	ENSTGUG00000011838	ENSTGUT00000012338	HSF2	GO:0001162	molecular_function	RNA polymerase II intronic transcription regulatory region sequence-specific DNA binding
stratum 5a	3	63576345	ENSTGUG00000011838	ENSTGUT00000012338	HSF2	GO:0000978	molecular_function	RNA polymerase II proximal promoter sequence-specific DNA binding
stratum 5a	3	63576345	ENSTGUG00000011838	ENSTGUT00000012338	HSF2	GO:0007283	biological_process	spermatogenesis
stratum 5a	3	63576345	ENSTGUG00000011838	ENSTGUT00000012338	HSF2	GO:0000977	molecular_function	RNA polymerase II regulatory region sequence-specific DNA binding
stratum 5a	3	63576345	ENSTGUG00000011838	ENSTGUT00000012338	HSF2	GO:0005654	cellular_component	nucleoplasm
stratum 5a	3	63576345	ENSTGUG00000011838	ENSTGUT00000012338	HSF2	GO:0001228	molecular_function	transcriptional activator activity, RNA polymerase II transcription regulatory region sequence-specific DNA binding
stratum 5a	3	63576345	ENSTGUG00000011838	ENSTGUT00000012338	HSF2	GO:0006357	biological_process	regulation of transcription by RNA polymerase II
stratum 5a	3	63576345	ENSTGUG00000011838	ENSTGUT00000012338	HSF2	GO:0003677	molecular_function	DNA binding
stratum 5a	3	63576345	ENSTGUG00000011838	ENSTGUT00000012338	HSF2	GO:0005634	cellular_component	nucleus
stratum 5a	3	63576345	ENSTGUG00000011838	ENSTGUT00000012338	HSF2	GO:0042803	molecular_function	protein homodimerization activity
stratum 5a	3	63576345	ENSTGUG00000011838	ENSTGUT00000012338	HSF2	GO:0043565	molecular_function	sequence-specific DNA binding
stratum 5a	3	63576345	ENSTGUG00000011838	ENSTGUT00000012338	HSF2	GO:0003700	molecular_function	DNA binding transcription factor activity
stratum 5a	3	63576345	ENSTGUG00000011838	ENSTGUT00000012338	HSF2	GO:0045944	biological_process	positive regulation of transcription by RNA polymerase II
stratum 5a	3	63576345	ENSTGUG00000011838	ENSTGUT00000012338	HSF2	GO:0006355	biological_process	regulation of transcription, DNA-templated
stratum 5a	3	64976461	ENSTGUG00000011874	ENSTGUT00000012369	MCM9	GO:0006974	biological_process	cellular response to DNA damage stimulus
stratum 5a	3	64976461	ENSTGUG00000011874	ENSTGUT00000012369	MCM9	GO:0007292	biological_process	female gamete generation
stratum 5a	3	64976461	ENSTGUG00000011874	ENSTGUT00000012369	MCM9	GO:0097362	cellular_component	MCM8-MCM9 complex
stratum 5a	3	64976461	ENSTGUG00000011874	ENSTGUT00000012369	MCM9	GO:0000166	molecular_function	nucleotide binding
stratum 5a	3	64976461	ENSTGUG00000011874	ENSTGUT00000012369	MCM9	GO:0003677	molecular_function	DNA binding
stratum 5a	3	64976461	ENSTGUG00000011874	ENSTGUT00000012369	MCM9	GO:0007276	biological_process	gamete generation
stratum 5a	3	64976461	ENSTGUG00000011874	ENSTGUT00000012369	MCM9	GO:0006270	biological_process	DNA replication initiation
stratum 5a	3	64976461	ENSTGUG00000011874	ENSTGUT00000012369	MCM9	GO:0005524	molecular_function	ATP binding
stratum 5a	3	64976461	ENSTGUG00000011874	ENSTGUT00000012369	MCM9	GO:0000724	biological_process	double-strand break repair via homologous recombination
stratum 5a	3	65555893	ENSTGUG00000011901	ENSTGUT00000012398	NA	GO:0007289	biological_process	spermatid nucleus differentiation
stratum 5a	3	65555893	ENSTGUG00000011901	ENSTGUT00000012398	NA	GO:0005109	molecular_function	frizzled binding
stratum 5a	3	65555893	ENSTGUG00000011901	ENSTGUT00000012398	NA	GO:0030695	molecular_function	GTPase regulator activity
stratum 5a	3	65555893	ENSTGUG00000011901	ENSTGUT00000012398	NA	GO:0042803	molecular_function	protein homodimerization activity
stratum 5a	3	65555893	ENSTGUG00000011901	ENSTGUT00000012398	NA	GO:0005794	cellular_component	Golgi apparatus
stratum 5a	3	65555893	ENSTGUG00000011901	ENSTGUT00000012398	NA	GO:0005886	cellular_component	plasma membrane
stratum 5a	3	65555893	ENSTGUG00000011901	ENSTGUT00000012398	NA	GO:0045202	cellular_component	synapse
stratum 5a	3	65555893	ENSTGUG00000011901	ENSTGUT00000012398	NA	GO:0043004	biological_process	cytoplasmic sequestering of CFTR protein
stratum 5a	3	65555893	ENSTGUG00000011901	ENSTGUT00000012398	NA	GO:0050790	biological_process	regulation of catalytic activity
stratum 5a	3	65555893	ENSTGUG00000011901	ENSTGUT00000012398	NA	GO:0008022	molecular_function	protein C-terminus binding
stratum 5a	3	65661063	ENSTGUG00000011909	ENSTGUT00000012415	ROS1	GO:0010629	biological_process	negative regulation of gene expression
stratum 5a	3	65661063	ENSTGUG00000011909	ENSTGUT00000012415	ROS1	GO:0016020	cellular_component	membrane
stratum 5a	3	65661063	ENSTGUG00000011909	ENSTGUT00000012415	ROS1	GO:0008283	biological_process	cell proliferation
stratum 5a	3	65661063	ENSTGUG00000011909	ENSTGUT00000012415	ROS1	GO:0007169	biological_process	transmembrane receptor protein tyrosine kinase signaling pathway
stratum 5a	3	65661063	ENSTGUG00000011909	ENSTGUT00000012415	ROS1	GO:0016021	cellular_component	integral component of membrane
stratum 5a	3	65661063	ENSTGUG00000011909	ENSTGUT00000012415	ROS1	GO:0007283	biological_process	spermatogenesis
stratum 5a	3	65661063	ENSTGUG00000011909	ENSTGUT00000012415	ROS1	GO:0004714	molecular_function	transmembrane receptor protein tyrosine kinase activity
stratum 5a	3	65661063	ENSTGUG00000011909	ENSTGUT00000012415	ROS1	GO:0010966	biological_process	regulation of phosphate transport
stratum 5a	3	65661063	ENSTGUG00000011909	ENSTGUT00000012415	ROS1	GO:0048471	cellular_component	perinuclear region of cytoplasm
stratum 5a	3	65661063	ENSTGUG00000011909	ENSTGUT00000012415	ROS1	GO:0009986	cellular_component	cell surface
stratum 5a	3	65661063	ENSTGUG00000011909	ENSTGUT00000012415	ROS1	GO:0000166	molecular_function	nucleotide binding
stratum 5a	3	65661063	ENSTGUG00000011909	ENSTGUT00000012415	ROS1	GO:0019903	molecular_function	protein phosphatase binding
stratum 5a	3	65661063	ENSTGUG00000011909	ENSTGUT00000012415	ROS1	GO:0004713	molecular_function	protein tyrosine kinase activity
stratum 5a	3	65661063	ENSTGUG00000011909	ENSTGUT00000012415	ROS1	GO:0016740	molecular_function	transferase activity
stratum 5a	3	65661063	ENSTGUG00000011909	ENSTGUT00000012415	ROS1	GO:0002066	biological_process	columnar/cuboidal epithelial cell development
stratum 5a	3	65661063	ENSTGUG00000011909	ENSTGUT00000012415	ROS1	GO:0016301	molecular_function	kinase activity
stratum 5a	3	65661063	ENSTGUG00000011909	ENSTGUT00000012415	ROS1	GO:0004672	molecular_function	protein kinase activity
stratum 5a	3	65661063	ENSTGUG00000011909	ENSTGUT00000012415	ROS1	GO:0005524	molecular_function	ATP binding
stratum 5a	3	65661063	ENSTGUG00000011909	ENSTGUT00000012415	ROS1	GO:0023014	biological_process	signal transduction by protein phosphorylation
stratum 5a	3	65661063	ENSTGUG00000011909	ENSTGUT00000012415	ROS1	GO:0001558	biological_process	regulation of cell growth
stratum 5a	3	65661063	ENSTGUG00000011909	ENSTGUT00000012415	ROS1	GO:0030154	biological_process	cell differentiation
stratum 5a	3	65661063	ENSTGUG00000011909	ENSTGUT00000012415	ROS1	GO:0070372	biological_process	regulation of ERK1 and ERK2 cascade
stratum 5a	3	65661063	ENSTGUG00000011909	ENSTGUT00000012415	ROS1	GO:0038083	biological_process	peptidyl-tyrosine autophosphorylation
stratum 5a	3	65661063	ENSTGUG00000011909	ENSTGUT00000012415	ROS1	GO:0016310	biological_process	phosphorylation
stratum 5a	3	65661063	ENSTGUG00000011909	ENSTGUT00000012415	ROS1	GO:0032006	biological_process	regulation of TOR signaling
stratum 5a	3	65661063	ENSTGUG00000011909	ENSTGUT00000012415	ROS1	GO:0006468	biological_process	protein phosphorylation
stratum 5a	3	65949680	ENSTGUG00000011932	ENSTGUT00000012430	RWDD1	GO:0005737	cellular_component	cytoplasm
stratum 5a	3	65949680	ENSTGUG00000011932	ENSTGUT00000012430	RWDD1	GO:2000825	biological_process	positive regulation of androgen receptor activity
stratum 5a	3	65949680	ENSTGUG00000011932	ENSTGUT00000012430	RWDD1	GO:0007569	biological_process	cell aging
stratum 5a	3	65949680	ENSTGUG00000011932	ENSTGUT00000012430	RWDD1	GO:0034599	biological_process	cellular response to oxidative stress
stratum 5a	3	65949680	ENSTGUG00000011932	ENSTGUT00000012430	RWDD1	GO:0071394	biological_process	cellular response to testosterone stimulus
stratum 5a	3	65949680	ENSTGUG00000011932	ENSTGUT00000012430	RWDD1	GO:0030521	biological_process	androgen receptor signaling pathway
stratum 5a	3	68533691	ENSTGUG00000012045	ENSTGUT00000012549	AMD1	GO:0006597	biological_process	spermine biosynthetic process
stratum 5a	3	68533691	ENSTGUG00000012045	ENSTGUT00000012549	AMD1	GO:0006557	biological_process	S-adenosylmethioninamine biosynthetic process
stratum 5a	3	68533691	ENSTGUG00000012045	ENSTGUT00000012549	AMD1	GO:0016829	molecular_function	lyase activity
stratum 5a	3	68533691	ENSTGUG00000012045	ENSTGUT00000012549	AMD1	GO:0004014	molecular_function	adenosylmethionine decarboxylase activity
stratum 5a	3	68533691	ENSTGUG00000012045	ENSTGUT00000012549	AMD1	GO:0008295	biological_process	spermidine biosynthetic process
stratum 5a	3	68533691	ENSTGUG00000012045	ENSTGUT00000012549	AMD1	GO:0016831	molecular_function	carboxy-lyase activity
stratum 5a	3	68533691	ENSTGUG00000012045	ENSTGUT00000012549	AMD1	GO:0006596	biological_process	polyamine biosynthetic process
stratum 5a	3	68745175	ENSTGUG00000012062	ENSTGUT00000012561	SLC22A16	GO:0016020	cellular_component	membrane
stratum 5a	3	68745175	ENSTGUG00000012062	ENSTGUT00000012561	SLC22A16	GO:0030317	biological_process	flagellated sperm motility
stratum 5a	3	68745175	ENSTGUG00000012062	ENSTGUT00000012561	SLC22A16	GO:0046717	biological_process	acid secretion
stratum 5a	3	68745175	ENSTGUG00000012062	ENSTGUT00000012561	SLC22A16	GO:0016021	cellular_component	integral component of membrane
stratum 5a	3	68745175	ENSTGUG00000012062	ENSTGUT00000012561	SLC22A16	GO:0015226	molecular_function	carnitine transmembrane transporter activity
stratum 5a	3	68745175	ENSTGUG00000012062	ENSTGUT00000012561	SLC22A16	GO:0055085	biological_process	transmembrane transport
stratum 5a	3	68745175	ENSTGUG00000012062	ENSTGUT00000012561	SLC22A16	GO:0005275	molecular_function	amine transmembrane transporter activity
stratum 5a	3	68745175	ENSTGUG00000012062	ENSTGUT00000012561	SLC22A16	GO:0022857	molecular_function	transmembrane transporter activity
stratum 5a	3	68745175	ENSTGUG00000012062	ENSTGUT00000012561	SLC22A16	GO:0007338	biological_process	single fertilization
stratum 5a	3	68745175	ENSTGUG00000012062	ENSTGUT00000012561	SLC22A16	GO:1902603	biological_process	carnitine transmembrane transport
stratum 5a	3	68745175	ENSTGUG00000012062	ENSTGUT00000012561	SLC22A16	GO:0015101	molecular_function	organic cation transmembrane transporter activity
stratum 5a	3	68745175	ENSTGUG00000012062	ENSTGUT00000012561	SLC22A16	GO:0015879	biological_process	carnitine transport
stratum 5a	3	68745175	ENSTGUG00000012062	ENSTGUT00000012561	SLC22A16	GO:0015695	biological_process	organic cation transport
stratum 5a	3	68745175	ENSTGUG00000012062	ENSTGUT00000012561	SLC22A16	GO:0015837	biological_process	amine transport
stratum 5a	3	69528594	ENSTGUG00000012135	ENSTGUT00000012636	FOXO3	GO:0006390	biological_process	mitochondrial transcription
stratum 5a	3	69528594	ENSTGUG00000012135	ENSTGUT00000012636	FOXO3	GO:0001556	biological_process	oocyte maturation
stratum 5a	3	69528594	ENSTGUG00000012135	ENSTGUT00000012636	FOXO3	GO:0006417	biological_process	regulation of translation
stratum 5a	3	69528594	ENSTGUG00000012135	ENSTGUT00000012636	FOXO3	GO:0001547	biological_process	antral ovarian follicle growth
stratum 5a	3	69528594	ENSTGUG00000012135	ENSTGUT00000012636	FOXO3	GO:0043065	biological_process	positive regulation of apoptotic process
stratum 5a	3	69528594	ENSTGUG00000012135	ENSTGUT00000012636	FOXO3	GO:0006357	biological_process	regulation of transcription by RNA polymerase II
stratum 5a	3	69528594	ENSTGUG00000012135	ENSTGUT00000012636	FOXO3	GO:0034599	biological_process	cellular response to oxidative stress
stratum 5a	3	69528594	ENSTGUG00000012135	ENSTGUT00000012636	FOXO3	GO:0042593	biological_process	glucose homeostasis
stratum 5a	3	69528594	ENSTGUG00000012135	ENSTGUT00000012636	FOXO3	GO:0001544	biological_process	initiation of primordial ovarian follicle growth
stratum 5a	3	69528594	ENSTGUG00000012135	ENSTGUT00000012636	FOXO3	GO:0006355	biological_process	regulation of transcription, DNA-templated
stratum 5a	3	69528594	ENSTGUG00000012135	ENSTGUT00000012636	FOXO3	GO:0003700	molecular_function	DNA binding transcription factor activity
stratum 5a	3	69528594	ENSTGUG00000012135	ENSTGUT00000012636	FOXO3	GO:0048854	biological_process	brain morphogenesis
stratum 5a	3	69528594	ENSTGUG00000012135	ENSTGUT00000012636	FOXO3	GO:0090090	biological_process	negative regulation of canonical Wnt signaling pathway
stratum 5a	3	69528594	ENSTGUG00000012135	ENSTGUT00000012636	FOXO3	GO:0097192	biological_process	extrinsic apoptotic signaling pathway in absence of ligand
stratum 5a	3	69528594	ENSTGUG00000012135	ENSTGUT00000012636	FOXO3	GO:0030330	biological_process	DNA damage response, signal transduction by p53 class mediator
stratum 5a	3	69528594	ENSTGUG00000012135	ENSTGUT00000012636	FOXO3	GO:2000177	biological_process	regulation of neural precursor cell proliferation
stratum 5a	3	69528594	ENSTGUG00000012135	ENSTGUT00000012636	FOXO3	GO:0033209	biological_process	tumor necrosis factor-mediated signaling pathway
stratum 5a	3	69528594	ENSTGUG00000012135	ENSTGUT00000012636	FOXO3	GO:0005654	cellular_component	nucleoplasm
stratum 5a	3	69528594	ENSTGUG00000012135	ENSTGUT00000012636	FOXO3	GO:0005737	cellular_component	cytoplasm
stratum 5a	3	69528594	ENSTGUG00000012135	ENSTGUT00000012636	FOXO3	GO:0043525	biological_process	positive regulation of neuron apoptotic process
stratum 5a	3	69528594	ENSTGUG00000012135	ENSTGUT00000012636	FOXO3	GO:0045648	biological_process	positive regulation of erythrocyte differentiation
stratum 5a	3	69528594	ENSTGUG00000012135	ENSTGUT00000012636	FOXO3	GO:0005634	cellular_component	nucleus
stratum 5a	3	69528594	ENSTGUG00000012135	ENSTGUT00000012636	FOXO3	GO:0045893	biological_process	positive regulation of transcription, DNA-templated
stratum 5a	3	69528594	ENSTGUG00000012135	ENSTGUT00000012636	FOXO3	GO:0045944	biological_process	positive regulation of transcription by RNA polymerase II
stratum 5a	3	69528594	ENSTGUG00000012135	ENSTGUT00000012636	FOXO3	GO:0032991	cellular_component	protein-containing complex
stratum 5a	3	69528594	ENSTGUG00000012135	ENSTGUT00000012636	FOXO3	GO:0006366	biological_process	transcription by RNA polymerase II
stratum 5a	3	69528594	ENSTGUG00000012135	ENSTGUT00000012636	FOXO3	GO:0097150	biological_process	neuronal stem cell population maintenance
stratum 5a	3	69528594	ENSTGUG00000012135	ENSTGUT00000012636	FOXO3	GO:0019901	molecular_function	protein kinase binding
stratum 5a	3	69528594	ENSTGUG00000012135	ENSTGUT00000012636	FOXO3	GO:0001227	molecular_function	transcriptional repressor activity, RNA polymerase II transcription regulatory region sequence-specific DNA binding
stratum 5a	3	69528594	ENSTGUG00000012135	ENSTGUT00000012636	FOXO3	GO:2000377	biological_process	regulation of reactive oxygen species metabolic process
stratum 5a	3	69528594	ENSTGUG00000012135	ENSTGUT00000012636	FOXO3	GO:0008013	molecular_function	beta-catenin binding
stratum 5a	3	69528594	ENSTGUG00000012135	ENSTGUT00000012636	FOXO3	GO:0005829	cellular_component	cytosol
stratum 5a	3	69528594	ENSTGUG00000012135	ENSTGUT00000012636	FOXO3	GO:0003677	molecular_function	DNA binding
stratum 5a	3	69528594	ENSTGUG00000012135	ENSTGUT00000012636	FOXO3	GO:0006351	biological_process	transcription, DNA-templated
stratum 5a	3	69528594	ENSTGUG00000012135	ENSTGUT00000012636	FOXO3	GO:0001542	biological_process	ovulation from ovarian follicle
stratum 5a	3	69528594	ENSTGUG00000012135	ENSTGUT00000012636	FOXO3	GO:0005741	cellular_component	mitochondrial outer membrane
stratum 5a	3	69528594	ENSTGUG00000012135	ENSTGUT00000012636	FOXO3	GO:0016020	cellular_component	membrane
stratum 5a	3	69528594	ENSTGUG00000012135	ENSTGUT00000012636	FOXO3	GO:0043565	molecular_function	sequence-specific DNA binding
stratum 5a	3	69528594	ENSTGUG00000012135	ENSTGUT00000012636	FOXO3	GO:0001228	molecular_function	transcriptional activator activity, RNA polymerase II transcription regulatory region sequence-specific DNA binding
stratum 5a	3	69528594	ENSTGUG00000012135	ENSTGUT00000012636	FOXO3	GO:0000978	molecular_function	RNA polymerase II proximal promoter sequence-specific DNA binding
stratum 5a	3	69528594	ENSTGUG00000012135	ENSTGUT00000012636	FOXO3	GO:0000122	biological_process	negative regulation of transcription by RNA polymerase II
stratum 5a	3	69528594	ENSTGUG00000012135	ENSTGUT00000012636	FOXO3	GO:0031490	molecular_function	chromatin DNA binding
stratum 5a	3	69528594	ENSTGUG00000012135	ENSTGUT00000012636	FOXO3	GO:0005739	cellular_component	mitochondrion
stratum 5a	3	69528594	ENSTGUG00000012135	ENSTGUT00000012636	FOXO3	GO:0034246	molecular_function	mitochondrial sequence-specific DNA binding transcription factor activity
stratum 5a	3	69528594	ENSTGUG00000012135	ENSTGUT00000012636	FOXO3	GO:0005759	cellular_component	mitochondrial matrix
stratum 5b	5	38289559	ENSTGUG00000012191	ENSTGUT00000012703	EIF2B2	GO:0005524	molecular_function	ATP binding
stratum 5b	5	38289559	ENSTGUG00000012191	ENSTGUT00000012703	EIF2B2	GO:0050852	biological_process	T cell receptor signaling pathway
stratum 5b	5	38289559	ENSTGUG00000012191	ENSTGUT00000012703	EIF2B2	GO:0014003	biological_process	oligodendrocyte development
stratum 5b	5	38289559	ENSTGUG00000012191	ENSTGUT00000012703	EIF2B2	GO:0007417	biological_process	central nervous system development
stratum 5b	5	38289559	ENSTGUG00000012191	ENSTGUT00000012703	EIF2B2	GO:0042552	biological_process	myelination
stratum 5b	5	38289559	ENSTGUG00000012191	ENSTGUT00000012703	EIF2B2	GO:0001541	biological_process	ovarian follicle development
stratum 5b	5	38289559	ENSTGUG00000012191	ENSTGUT00000012703	EIF2B2	GO:0005737	cellular_component	cytoplasm
stratum 5b	5	38289559	ENSTGUG00000012191	ENSTGUT00000012703	EIF2B2	GO:0005085	molecular_function	guanyl-nucleotide exchange factor activity
stratum 5b	5	38289559	ENSTGUG00000012191	ENSTGUT00000012703	EIF2B2	GO:0005851	cellular_component	eukaryotic translation initiation factor 2B complex
stratum 5b	5	38289559	ENSTGUG00000012191	ENSTGUT00000012703	EIF2B2	GO:0006413	biological_process	translational initiation
stratum 5b	5	38289559	ENSTGUG00000012191	ENSTGUT00000012703	EIF2B2	GO:0005525	molecular_function	GTP binding
stratum 5b	5	38289559	ENSTGUG00000012191	ENSTGUT00000012703	EIF2B2	GO:0003743	molecular_function	translation initiation factor activity
stratum 5b	5	38289559	ENSTGUG00000012191	ENSTGUT00000012703	EIF2B2	GO:0044237	biological_process	cellular metabolic process
stratum 5b	5	38530552	ENSTGUG00000012226	ENSTGUT00000012738	TTLL5	GO:0007283	biological_process	spermatogenesis
stratum 5b	5	38530552	ENSTGUG00000012226	ENSTGUT00000012738	TTLL5	GO:0018095	biological_process	protein polyglutamylation
stratum 5b	5	38530552	ENSTGUG00000012226	ENSTGUT00000012738	TTLL5	GO:0006464	biological_process	cellular protein modification process
stratum 5b	5	38530552	ENSTGUG00000012226	ENSTGUT00000012738	TTLL5	GO:0005829	cellular_component	cytosol
stratum 5b	5	38530552	ENSTGUG00000012226	ENSTGUT00000012738	TTLL5	GO:0005886	cellular_component	plasma membrane
stratum 5b	5	38530552	ENSTGUG00000012226	ENSTGUT00000012738	TTLL5	GO:0009566	biological_process	fertilization
stratum 5b	5	38530552	ENSTGUG00000012226	ENSTGUT00000012738	TTLL5	GO:0007288	biological_process	sperm axoneme assembly
stratum 5b	5	38530552	ENSTGUG00000012226	ENSTGUT00000012738	TTLL5	GO:0030317	biological_process	flagellated sperm motility
stratum 5b	5	38530552	ENSTGUG00000012226	ENSTGUT00000012738	TTLL5	GO:0005813	cellular_component	centrosome
stratum 5b	5	38530552	ENSTGUG00000012226	ENSTGUT00000012738	TTLL5	GO:0060041	biological_process	retina development in camera-type eye
stratum 5b	5	38530552	ENSTGUG00000012226	ENSTGUT00000012738	TTLL5	GO:0005929	cellular_component	cilium
stratum 5b	5	38530552	ENSTGUG00000012226	ENSTGUT00000012738	TTLL5	GO:0005524	molecular_function	ATP binding
stratum 5a	3	75104420	ENSTGUG00000012318	ENSTGUT00000012831	UFL1	GO:0031397	biological_process	negative regulation of protein ubiquitination
stratum 5a	3	75104420	ENSTGUG00000012318	ENSTGUT00000012831	UFL1	GO:0008284	biological_process	positive regulation of cell proliferation
stratum 5a	3	75104420	ENSTGUG00000012318	ENSTGUT00000012831	UFL1	GO:0010468	biological_process	regulation of gene expression
stratum 5a	3	75104420	ENSTGUG00000012318	ENSTGUT00000012831	UFL1	GO:0032434	biological_process	regulation of proteasomal ubiquitin-dependent protein catabolic process
stratum 5a	3	75104420	ENSTGUG00000012318	ENSTGUT00000012831	UFL1	GO:0005737	cellular_component	cytoplasm
stratum 5a	3	75104420	ENSTGUG00000012318	ENSTGUT00000012831	UFL1	GO:0005783	cellular_component	endoplasmic reticulum
stratum 5a	3	75104420	ENSTGUG00000012318	ENSTGUT00000012831	UFL1	GO:0032088	biological_process	negative regulation of NF-kappaB transcription factor activity
stratum 5a	3	75104420	ENSTGUG00000012318	ENSTGUT00000012831	UFL1	GO:0033146	biological_process	regulation of intracellular estrogen receptor signaling pathway
stratum 5a	3	75104420	ENSTGUG00000012318	ENSTGUT00000012831	UFL1	GO:0034976	biological_process	response to endoplasmic reticulum stress
stratum 5a	3	75104420	ENSTGUG00000012318	ENSTGUT00000012831	UFL1	GO:0060252	biological_process	positive regulation of glial cell proliferation
stratum 5a	3	75104420	ENSTGUG00000012318	ENSTGUT00000012831	UFL1	GO:0071569	biological_process	protein ufmylation
stratum 5a	3	75104420	ENSTGUG00000012318	ENSTGUT00000012831	UFL1	GO:0071568	molecular_function	UFM1 transferase activity
stratum 5a	3	75104420	ENSTGUG00000012318	ENSTGUT00000012831	UFL1	GO:1990592	biological_process	protein K69-linked ufmylation
stratum 5a	3	75104420	ENSTGUG00000012318	ENSTGUT00000012831	UFL1	GO:0043005	cellular_component	neuron projection
stratum 5a	3	75104420	ENSTGUG00000012318	ENSTGUT00000012831	UFL1	GO:0005789	cellular_component	endoplasmic reticulum membrane
stratum 5a	3	75104420	ENSTGUG00000012318	ENSTGUT00000012831	UFL1	GO:0032991	cellular_component	protein-containing complex
stratum 5a	3	75104420	ENSTGUG00000012318	ENSTGUT00000012831	UFL1	GO:0032880	biological_process	regulation of protein localization
stratum 5a	3	75104420	ENSTGUG00000012318	ENSTGUT00000012831	UFL1	GO:1902065	biological_process	response to L-glutamate
stratum 5b	5	39670364	ENSTGUG00000012337	ENSTGUT00000012844	SLIRP	GO:0005739	cellular_component	mitochondrion
stratum 5b	5	39670364	ENSTGUG00000012337	ENSTGUT00000012844	SLIRP	GO:0005737	cellular_component	cytoplasm
stratum 5b	5	39670364	ENSTGUG00000012337	ENSTGUT00000012844	SLIRP	GO:0003676	molecular_function	nucleic acid binding
stratum 5b	5	39670364	ENSTGUG00000012337	ENSTGUT00000012844	SLIRP	GO:0007286	biological_process	spermatid development
stratum 5b	5	39670364	ENSTGUG00000012337	ENSTGUT00000012844	SLIRP	GO:0007338	biological_process	single fertilization
stratum 5b	5	39670364	ENSTGUG00000012337	ENSTGUT00000012844	SLIRP	GO:0030317	biological_process	flagellated sperm motility
stratum 5b	5	39670364	ENSTGUG00000012337	ENSTGUT00000012844	SLIRP	GO:0000961	biological_process	negative regulation of mitochondrial RNA catabolic process
stratum 5b	5	39670364	ENSTGUG00000012337	ENSTGUT00000012844	SLIRP	GO:0070584	biological_process	mitochondrion morphogenesis
stratum 5b	5	39670364	ENSTGUG00000012337	ENSTGUT00000012844	SLIRP	GO:0001669	cellular_component	acrosomal vesicle
stratum 5b	5	39670364	ENSTGUG00000012337	ENSTGUT00000012844	SLIRP	GO:1990904	cellular_component	ribonucleoprotein complex
stratum 5b	5	39670364	ENSTGUG00000012337	ENSTGUT00000012844	SLIRP	GO:0003723	molecular_function	RNA binding
stratum 5b	5	39670364	ENSTGUG00000012337	ENSTGUT00000012844	SLIRP	GO:0036126	cellular_component	sperm flagellum
stratum 5b	5	39670364	ENSTGUG00000012337	ENSTGUT00000012844	SLIRP	GO:0048471	cellular_component	perinuclear region of cytoplasm
stratum 5a	3	78000615	ENSTGUG00000012412	ENSTGUT00000012923	UBE2J1	GO:0042534	biological_process	regulation of tumor necrosis factor biosynthetic process
stratum 5a	3	78000615	ENSTGUG00000012412	ENSTGUT00000012923	UBE2J1	GO:1904153	biological_process	negative regulation of retrograde protein transport, ER to cytosol
stratum 5a	3	78000615	ENSTGUG00000012412	ENSTGUT00000012923	UBE2J1	GO:0016021	cellular_component	integral component of membrane
stratum 5a	3	78000615	ENSTGUG00000012412	ENSTGUT00000012923	UBE2J1	GO:0016567	biological_process	protein ubiquitination
stratum 5a	3	78000615	ENSTGUG00000012412	ENSTGUT00000012923	UBE2J1	GO:0031625	molecular_function	ubiquitin protein ligase binding
stratum 5a	3	78000615	ENSTGUG00000012412	ENSTGUT00000012923	UBE2J1	GO:0061631	molecular_function	ubiquitin conjugating enzyme activity
stratum 5a	3	78000615	ENSTGUG00000012412	ENSTGUT00000012923	UBE2J1	GO:0007286	biological_process	spermatid development
stratum 5a	3	78000615	ENSTGUG00000012412	ENSTGUT00000012923	UBE2J1	GO:0018279	biological_process	protein N-linked glycosylation via asparagine
stratum 5a	3	78000615	ENSTGUG00000012412	ENSTGUT00000012923	UBE2J1	GO:0030433	biological_process	ubiquitin-dependent ERAD pathway
stratum 5a	3	78000615	ENSTGUG00000012412	ENSTGUT00000012923	UBE2J1	GO:0016020	cellular_component	membrane
stratum 5a	3	78911732	ENSTGUG00000012470	ENSTGUT00000012982	CGA	GO:0048589	biological_process	developmental growth
stratum 5a	3	78911732	ENSTGUG00000012470	ENSTGUT00000012982	CGA	GO:0005179	molecular_function	hormone activity
stratum 5a	3	78911732	ENSTGUG00000012470	ENSTGUT00000012982	CGA	GO:0010469	biological_process	regulation of signaling receptor activity
stratum 5a	3	78911732	ENSTGUG00000012470	ENSTGUT00000012982	CGA	GO:0006590	biological_process	thyroid hormone generation
stratum 5a	3	78911732	ENSTGUG00000012470	ENSTGUT00000012982	CGA	GO:0005576	cellular_component	extracellular region
stratum 5a	3	78911732	ENSTGUG00000012470	ENSTGUT00000012982	CGA	GO:0030878	biological_process	thyroid gland development
stratum 5a	3	78911732	ENSTGUG00000012470	ENSTGUT00000012982	CGA	GO:0032275	biological_process	luteinizing hormone secretion
stratum 5a	3	78911732	ENSTGUG00000012470	ENSTGUT00000012982	CGA	GO:0032870	biological_process	cellular response to hormone stimulus
stratum 5a	3	78911732	ENSTGUG00000012470	ENSTGUT00000012982	CGA	GO:0046621	biological_process	negative regulation of organ growth
stratum 5a	3	78911732	ENSTGUG00000012470	ENSTGUT00000012982	CGA	GO:0046884	biological_process	follicle-stimulating hormone secretion
stratum 5a	3	78911732	ENSTGUG00000012470	ENSTGUT00000012982	CGA	GO:0008406	biological_process	gonad development
stratum 5a	3	80228533	ENSTGUG00000012547	ENSTGUT00000013068	PGM3	GO:0046872	molecular_function	metal ion binding
stratum 5a	3	80228533	ENSTGUG00000012547	ENSTGUT00000013068	PGM3	GO:0016853	molecular_function	isomerase activity
stratum 5a	3	80228533	ENSTGUG00000012547	ENSTGUT00000013068	PGM3	GO:0005975	biological_process	carbohydrate metabolic process
stratum 5a	3	80228533	ENSTGUG00000012547	ENSTGUT00000013068	PGM3	GO:0016868	molecular_function	intramolecular transferase activity, phosphotransferases
stratum 5a	3	80228533	ENSTGUG00000012547	ENSTGUT00000013068	PGM3	GO:0071704	biological_process	organic substance metabolic process
stratum 5a	3	80228533	ENSTGUG00000012547	ENSTGUT00000013068	PGM3	GO:0004610	molecular_function	phosphoacetylglucosamine mutase activity
stratum 5a	3	80228533	ENSTGUG00000012547	ENSTGUT00000013068	PGM3	GO:0000287	molecular_function	magnesium ion binding
stratum 5a	3	80228533	ENSTGUG00000012547	ENSTGUT00000013068	PGM3	GO:0006048	biological_process	UDP-N-acetylglucosamine biosynthetic process
stratum 5a	3	80228533	ENSTGUG00000012547	ENSTGUT00000013068	PGM3	GO:0006487	biological_process	protein N-linked glycosylation
stratum 5a	3	80228533	ENSTGUG00000012547	ENSTGUT00000013068	PGM3	GO:0006493	biological_process	protein O-linked glycosylation
stratum 5a	3	80228533	ENSTGUG00000012547	ENSTGUT00000013068	PGM3	GO:0007283	biological_process	spermatogenesis
stratum 5a	3	80228533	ENSTGUG00000012547	ENSTGUT00000013068	PGM3	GO:0019255	biological_process	glucose 1-phosphate metabolic process
stratum 5a	3	80228533	ENSTGUG00000012547	ENSTGUT00000013068	PGM3	GO:0030097	biological_process	hemopoiesis
stratum 5a	3	80228533	ENSTGUG00000012547	ENSTGUT00000013068	PGM3	GO:0004614	molecular_function	phosphoglucomutase activity
stratum 5a	3	82276885	ENSTGUG00000012612	ENSTGUT00000013128	MEI4	GO:0006310	biological_process	DNA recombination
stratum 5a	3	82276885	ENSTGUG00000012612	ENSTGUT00000013128	MEI4	GO:0042138	biological_process	meiotic DNA double-strand break formation
stratum 5a	3	82276885	ENSTGUG00000012612	ENSTGUT00000013128	MEI4	GO:0007283	biological_process	spermatogenesis
stratum 5a	3	82276885	ENSTGUG00000012612	ENSTGUT00000013128	MEI4	GO:0048477	biological_process	oogenesis
stratum 5a	3	82276885	ENSTGUG00000012612	ENSTGUT00000013128	MEI4	GO:0000800	cellular_component	lateral element
stratum 5a	3	82276885	ENSTGUG00000012612	ENSTGUT00000013128	MEI4	GO:0007129	biological_process	synapsis
